# Supplementary material for: Ethynylene-linked multifunctional benzoxazines: the effect of the ethynylene group and packing on thermal behavior
Source: Royal Society of Chemistry journal article supplement (doi:10.1039/d2py00840h), 2022-01-01
Supplement: d2py00840h4.pdf [file d2py00840h4.pdf]

Supplementary information

**Ethynylene-linked multifunctional benzoxazines: effect of ethynylene group and packing on thermal behavior**

Masanobu Muraoka,<sup>†</sup> Masahide Goto,<sup>†</sup> Masaki Minami,<sup>‡</sup> Dayang Zhou,<sup>§</sup> Takeyuki Suzuki,<sup>§</sup> Tatsuo Yajima,<sup>†</sup> Jun'ichi Hayashi,<sup>⊥</sup> Hiromitsu Sogawa,<sup>†</sup> Fumio Sanda<sup>\*,†</sup>

<sup>†</sup> Department of Chemistry and Materials Engineering, Faculty of Chemistry, Materials and Bioengineering, Kansai University, 3-3-35 Yamate-cho, Suita, Osaka 564-8680, Japan

<sup>‡</sup> Chemicals R&D Group, HPM Research and Development Department, High Performance Materials Company, ENEOS Corporation, 8 Chidori-cho, Naka-ku, Yokohama, Kanagawa 231-0815, Japan

<sup>§</sup> Comprehensive Analysis Center, SANKEN, Osaka University, Ibaraki, Osaka 567-0047, Japan

<sup>⊥</sup> Department of Chemical, Energy and Environmental Engineering, Faculty of Environmental and Urban Engineering, Kansai University, 3-3-35 Yamate-cho, Suita, Osaka 564-8680, Japan

\* Corresponding Author

## Experimental section

**Measurements.** Solution state  $^1\text{H}$  and  $^{13}\text{C}$  NMR spectra were recorded on JEOL JNM-ECZ400, JNM-ECS400 and BRUKER AVANCE III 700 spectrometers. Solid state  $^{13}\text{C}$  NMR spectra were recorded on a BRUKER AVANCE III 600WB. Melting points (mp) were measured on a Yanaco micro melting point apparatus. IR absorption spectra were measured on a JASCO FT/IR-4100 spectrophotometer. ESI-TOF mass spectra were measured on an Applied Biosystems APCI-3000 and a Shimadzu LCMS-IT-TOF. Single crystal X-ray analysis was performed using a Rigaku RAXIS imaging plate area detector with graphite-monochromated Mo-K $\alpha$  radiation ( $\lambda = 0.71075 \text{ \AA}$ ). A crystal was mounted on a nylon loop at 123 K. The structure was solved and refined using the Olex2<sup>S1</sup> and SHELX<sup>S2,S3</sup> programs. XRD spectra were measured on a BRUKER D2 PHASER with Cu-K $\alpha$  radiation. The ring-opening crosslinking reaction of the samples was carried out in a Nitto small electric furnace mini-BSI. DSC was measured on a Rigaku Thermoplus EVO DSC 8230 under air. TGA was measured with a Shimadzu thermogravimetric analyzer TGA-50 with a heating rate of  $10 \text{ }^\circ\text{C min}^{-1}$  from  $50 \text{ }^\circ\text{C}$  to  $800 \text{ }^\circ\text{C}$  under nitrogen at a flow rate of  $50 \text{ mL min}^{-1}$ . Densities were measured with a Shimadzu gas pycnometer AccuPyc II 1340 at  $26 \text{ }^\circ\text{C}$ , in which averages of 10 measurements were employed. BET specific surface area and micropore volume were measured by using  $\text{N}_2$  adsorption isotherm at 77 K on a Microtrac BEL, BELSORP-mini II.  $\text{CO}_2$  adsorption isotherms were measured at 298 K on a Microtrac BEL, BELSORP-28. Field emission scanning electron microscopy (FE-SEM) observation was performed on a JEOL JSM 6700f.

**Reagents.** Pd-Bz was obtained from Seika Corporation. The other reagents were purchased and used without purification unless otherwise stated. *p*-Ethyneylaniline (FUJIFILM Wako Pure Chemical Corporation), salicylaldehyde (Tokyo Chemical Industry Co., TCI), ethanol (EtOH, FUJIFILM Wako), sodium borohydride (NaBH<sub>4</sub>, TCI), paraformaldehyde (FUJIFILM Wako), 1,4-dioxane (FUJIFILM Wako), iodobenzene (FUJIFILM Wako), triphenylphosphine (FUJIFILM Wako), copper(I) iodide (CuI(I), NACALAI TESQUE, INC.), bis(triphenylphosphine)palladium(II)dichloride, tetrahydrofuran (THF) with stabilizer (FUJIFILM Wako), 2-dicyclohexylphosphino-2',4',6'-triisopropyl-1,1'-biphenyl (XPhos, TCI), triethylamine (Et<sub>3</sub>N, NACALAI), 1,4-diiodobenzene (TCI), 1,3,5-tribromobenzene (TCI), potassium iodide (KI, NACALAI), 1,3-dimethyl-2-imidazolidinone (DMI, FUJIFILM Wako), anhydrous magnesium sulfate (MgSO<sub>4</sub>, FUJIFILM Wako), hexane (NACALAI), dichloromethane (CH<sub>2</sub>Cl<sub>2</sub>, NACALAI), sodium hydroxide (NaOH, NACALAI) were used without purification. Solvents used in the reaction under Ar and N<sub>2</sub> were dehydrated over molecular sieves 4A1/16 and degassed by Ar and N<sub>2</sub> gas bubbling, respectively.

### **Synthesis of 3-(4-Ethynyl)phenyl-3,4-dihydro-1,3-benzoxazine (6)**

Compound **6** was synthesized according to Scheme S1. The synthetic procedures follow the scheme.

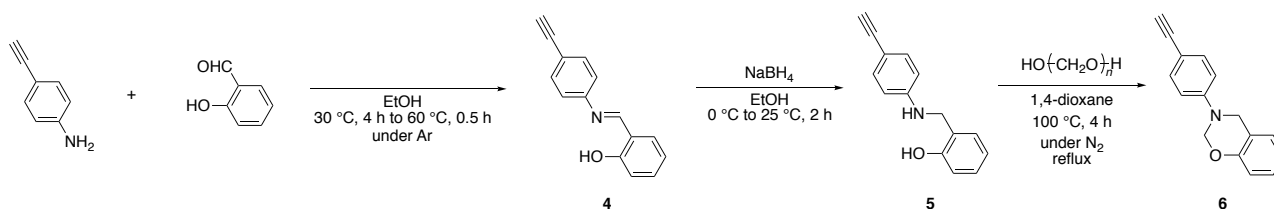

**Scheme S1** Synthesis of **6**.

### **(E)-2-(((4-ethynylphenyl)imino)methyl)phenol (4)**

*p*-Ethynylaniline (10.6 g, 90.3 mmol) was fed in a glass flask. It was degassed and filled with Ar. EtOH (180 mL) was added to the flask, and the resulting solution was stirred at room temperature for 5 min. It was heated to 30 °C; then salicylaldehyde (9.60 mL, 90.3 mmol) was added to the solution. The resulting mixture was stirred at 30 °C for 4 h, and then stirred at 60 °C for 0.5 h. The mixture was cooled with ice water to precipitate a solid mass. It was separated by filtration using a Kiriya funnel, and dried under reduced pressure overnight to obtain yellow solid **4** (14.4 g, 64.9 mmol). Yield 72%. <sup>1</sup>H NMR (400 MHz, CDCl<sub>3</sub>): δ 3.12 (s, 1H, CH≡C), 6.92–7.03 (m, 1H, Ar), 7.01–7.03 (m, 1H, Ar), 7.15–7.28 (m, 3H, Ar), 7.33–7.44 (m, 2H, Ar), 7.51–7.59 (m, 2H, Ar), 8.60 (s, 1H, N=CH) ppm.

### **2-(((4-Ethynylphenyl)amino)methyl)phenol (5)**

Compound **4** (14.4 g, 64.9 mmol) was fed in a glass flask, EtOH (300 mL) was added to the flask, and the resulting solution was cooled to 0 °C and stirred for 5 min. NaBH<sub>4</sub> (1.84 g, 64.9 mmol) was added to the solution, and the resulting mixture was stirred at room temperature for 2 h. Pure water (10 mL) was added to the mixture, and the resulting mixture was stirred for a while to dissolve residual

NaBH<sub>4</sub>. Then the reaction mixture was sequentially washed with CH<sub>2</sub>Cl<sub>2</sub> (300 mL), 1 M NaOH aq (100 mL × 3). Solvents were evaporated under reduced pressure overnight to obtain brownish white solid **5** (13.3 g, 59.4 mmol). Yield 92%. <sup>1</sup>H NMR (400 MHz, CDCl<sub>3</sub>): δ 2.98 (s, 1H, CH≡C), 4.10 (s, 1H, –NH–), 4.40 (s, 2H, N–CH<sub>2</sub>–), 6.66–6.78 (m, 2H, Ar), 6.87–6.97 (m, 2H, Ar), 7.16–7.27 (m, 2H, Ar), 7.34–7.38 (m, 2H, Ar), 7.46 (s, 1H, –OH) ppm.

### **3-(4-Ethynylphenyl)-3,4-dihydro-2H-[1,3]benzoxazine (6)**<sup>S4</sup>

Compound **5** (13.3 g, 59.4 mmol) and paraformaldehyde (2.05 g, 67.4 mmol) were fed in a glass flask. It was degassed and filled with N<sub>2</sub>. 1,4-Dioxane (200 mL) was added to the flask, and the resulting mixture was stirred at 100 °C for 4 h. The mixture was cooled to room temperature, and CH<sub>2</sub>Cl<sub>2</sub> (90 mL) was added to the mixture. The resulting solution was washed with 1 M NaOH aq (30 mL × 3) to obtain a clear yellow solution. The organic phase was separated, and the solvents were evaporated under reduced pressure to obtain yellow solid **6** (13.4 g, 57.0 mmol). Yield 96%. <sup>1</sup>H NMR (400 MHz, CDCl<sub>3</sub>): δ 2.98 (s, 1H, CH≡C), 4.63 (s, 2H, Ar–CH<sub>2</sub>–N), 5.35 (s, 2H, O–CH<sub>2</sub>–N), 6.80–6.93 (m, 2H, Ar), 6.98–7.17 (m, 4H, Ar), 7.37–7.45 (m, 2H, Ar) ppm.

### **1,3,5-Triiodobenzene**<sup>S5,S6</sup>

The title compound was synthesized according to Scheme S2. The synthetic procedure follows the scheme.

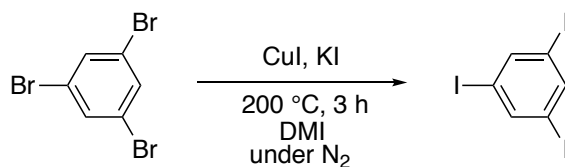

**Scheme S2** Synthesis of 1,3,5-triiodobenzene.

1,3,5-Tribromobenzene (4.00 g), CuI (5.78 g), KI (6.71 g) were fed in a glass flask. It was degassed and filled with N<sub>2</sub>. DMI (70 mL) was added to the flask, and the resulting mixture was stirred at 200°C for 2 h. The reaction mixture was cooled with ice water to precipitate a solid mass. It was separated by filtration and washed with diethyl ether/brine to obtain 1,3,5-tribromobenzene as white solid (2.45 g). Yield 42%. <sup>1</sup>H NMR (400 MHz, CDCl<sub>3</sub>): δ 7.19 (s, 3H) ppm.

### 3-(4-(Phenylethynyl)phenyl)-3,4-dihydro-2H-[1,3]benzoxazine (1)

The title compound was synthesized according to Scheme 1. The synthetic procedure is as follows. Compound **6** (4.24 g, 17.9 mmol), PPh<sub>3</sub> (0.967 g, 3.59 mmol), CuI (6.99×10<sup>-2</sup> g, 0.359 mmol) and (PPh<sub>3</sub>)<sub>2</sub>PdCl<sub>2</sub> (0.132 g, 0.179 mmol) were fed in a glass flask. It was degassed and filled with Ar. THF (30 mL), Et<sub>3</sub>N (25 mL) and iodobenzene (2.0 mL, 17.9 mmol) were added to the flask, and the resulting mixture was stirred at 80 °C for 24 h under light shielding. Then the reaction mixture was sequentially washed with CH<sub>2</sub>Cl<sub>2</sub> (90 mL), 1 M NaOH aq (30 mL × 3), and pure water (30 mL). The organic phase was separated, and solvents were evaporated under reduced pressure overnight. a yellow solid was obtained, which was purified by recrystallization with CH<sub>2</sub>Cl<sub>2</sub>/hexane to give a yellowish-white solid **1** (4.10 g, 13.2 mmol). Yield 73%, mp = 134–137 °C. IR (KBr disk): 3279, 3042, 2858, 2818, 2212, 1884, 1609, 1523, 1259, 1008, 816, 751, 690, 544 cm<sup>-1</sup>. <sup>1</sup>H NMR (400 MHz, DMSO-

$d_6$ ):  $\delta$  4.71 (s, 2H, Ar-CH<sub>2</sub>-N), 5.49 (s, 2H, O-CH<sub>2</sub>-N), 6.70–6.73 (m, 1H, Ar), 6.83–6.87 (m, 1H, Ar), 7.04–7.15 (m, 4H, Ar), 7.31–7.40 (m, 5H, Ar), 7.43–7.49 (m, 2H, Ar) ppm. <sup>13</sup>C NMR (100 MHz, DMSO- $d_6$ ):  $\delta$  48.9, 78.3, 88.5, 90.3, 113.8, 116.9, 117.2, 121.2, 121.8, 123.3, 127.8, 128.3, 128.8, 129.2, 131.6, 133.0, 148.4, 154.4 ppm. ESI-MS ( $m/z$ ): calcd. 312.1383 ([C<sub>22</sub>H<sub>17</sub>NO + H]<sup>+</sup>), found 312.1362.

### **1,4-Bis((4-(2H-3(4H)-[1,3]benzoxazinyl)phenyl)ethynyl)benzene (2)**

Compound **2** was synthesized from **6** and 1,4-diodobenzene in a manner similar to **1**. XPhos was used instead of PPh<sub>3</sub>. Yield 70%, yellowish-white solid, mp = 254–258 °C. IR (KBr disk): 3435, 3043, 2918, 2882, 2850, 2213, 1893, 1605, 1522, 1256, 1048, 817, 748, 532 cm<sup>-1</sup>. <sup>1</sup>H NMR (400 MHz, CDCl<sub>3</sub>):  $\delta$  4.65 (s, 4H, Ar-CH<sub>2</sub>-N), 5.36 (s, 4H, O-CH<sub>2</sub>-N), 6.80–6.91 (m, 4H, Ar), 6.99–7.14 (m, 8H, Ar), 7.40–7.43 (m, 8H, Ar) ppm. <sup>13</sup>C NMR (175 MHz, CDCl<sub>3</sub>):  $\delta$  50.1, 78.6, 88.2, 91.3, 115.2, 117.1, 117.3, 120.7, 121.1, 123.0, 126.8, 128.0, 131.3, 132.8, 148.2, 154.2 ppm. ESI-MS ( $m/z$ ): calcd. 545.2224 ([C<sub>38</sub>H<sub>28</sub>N<sub>2</sub>O<sub>2</sub> + H]<sup>+</sup>), found 545.2212.

### **1,3,5-Tris((4-(2H-3(4H)-[1,3]benzoxazinyl)phenyl)ethynyl)benzene (3)**

Compound **3** was synthesized from **6** and 1,3,5-triiodobenzene in a manner similar to **1**. It was purified by recrystallization with CH<sub>2</sub>Cl<sub>2</sub>/hexane. Yield 64%, yellow solid, mp = 136–140 °C. IR (KBr disk): 3398, 3040, 2893, 2851, 2567, 2360, 2203, 1894, 1782, 1607, 1577, 1512, 1226, 947, 754, 540 cm<sup>-1</sup>. <sup>1</sup>H NMR (400 MHz, DMSO- $d_6$ ):  $\delta$  4.66 (s, 6H, Ar-CH<sub>2</sub>-N), 5.44 (s, 6H, O-CH<sub>2</sub>-N), 6.65–6.77 (m, 3H, Ar), 6.83–6.91 (m, 3H, Ar), 7.04–7.21 (m, 12H, Ar), 7.33–7.82 (m, 9H, Ar) ppm. <sup>13</sup>C NMR (100

MHz, CDCl<sub>3</sub>):  $\delta$  50.1, 78.6, 87.1, 90.6, 115.1, 117.2, 117.3, 120.7, 121.1, 124.3, 126.8, 128.1, 133.0, 133.5, 148.4, 154.4 ppm. ESI-MS ( $m/z$ ): calcd. 778.3064 ([C<sub>54</sub>H<sub>39</sub>N<sub>3</sub>O<sub>3</sub> + H]<sup>+</sup>), found 778.3049.

### **Polymerization: typical procedure.**

A powdery sample of **1** was fed into an aluminum sample pan. It was placed on a glass petri dish, and heated in a Nitto small electric furnace mini-BSI at 150–300 °C for 2 h under N<sub>2</sub> to obtain Poly(**1**).

### **Curing Kinetics.**

The activation energies ( $E_a$ ) for curing of **1–3** were determined by Ozawa–Flynn–Wall method,<sup>S7–S9</sup> based on the DSC measurements at heating rates of 5, 10, 15, and 20 °C/min (Fig. S38–S40). The values of  $E_a$  were calculated using the following equation,

$$\ln(\beta) = -1.052E_a/RT_p + C$$

where  $\beta$  is the heating rate,  $T_p$  is the temperature at the exothermic peak maximum, R is the gas constant, and C is a constant.  $E_a$  can be obtained from the slope of the plot of  $\ln(\beta)$  versus  $1/T_p$ . The  $E_a$  values for curing of **1**, **2** and **3** were 83.52, 133.75 and 67.14 kJ/mol, respectively. It is considered that molecules of **2** are densely packed compared with **1** and **3**, leading to low mobility, resulting in the high  $E_a$ .



**Computations.** DFT calculations were performed with Gaussian 16,<sup>S10</sup> ES64L-G16 Rev C.01, using  $\omega$ B97X-D functional in conjunction with 6-31G\* basis set, running on the supercomputer system, Academic Center for Computing and Media Studies, Kyoto University. Noncovalent interaction plot was performed using NCIPLLOT.<sup>S11,S12</sup> MD simulations were performed with LAMMPS 2020,<sup>S13</sup> running on the supercomputer system, Fugaku provided by the RIKEN Center for Computational Science.

**CO<sub>2</sub> adsorption.** Unlike the corresponding benzoxazine monomers, polybenzoxazines poly(**1**)–poly(**3**) showed no sharp XRD peaks (Fig. S47). It is considered that poly(**1**)–poly(**3**) do not exhibit the regulated angstrom-order molecular alignment observed in the corresponding monomers, while the polymers formed micron/submicron pores that efficiently adsorb CO<sub>2</sub>. Physisorption is an effective capture method because of the low energy consumption, high efficiency, easy regeneration and high cost-effectiveness.<sup>S14,S15</sup>

**Morphology.** The samples of benzoxazines **1**, **2**, **3** and Pd-Bz were observed by FE-SEM after curing to obtain information on the surface morphology (Fig. S52).

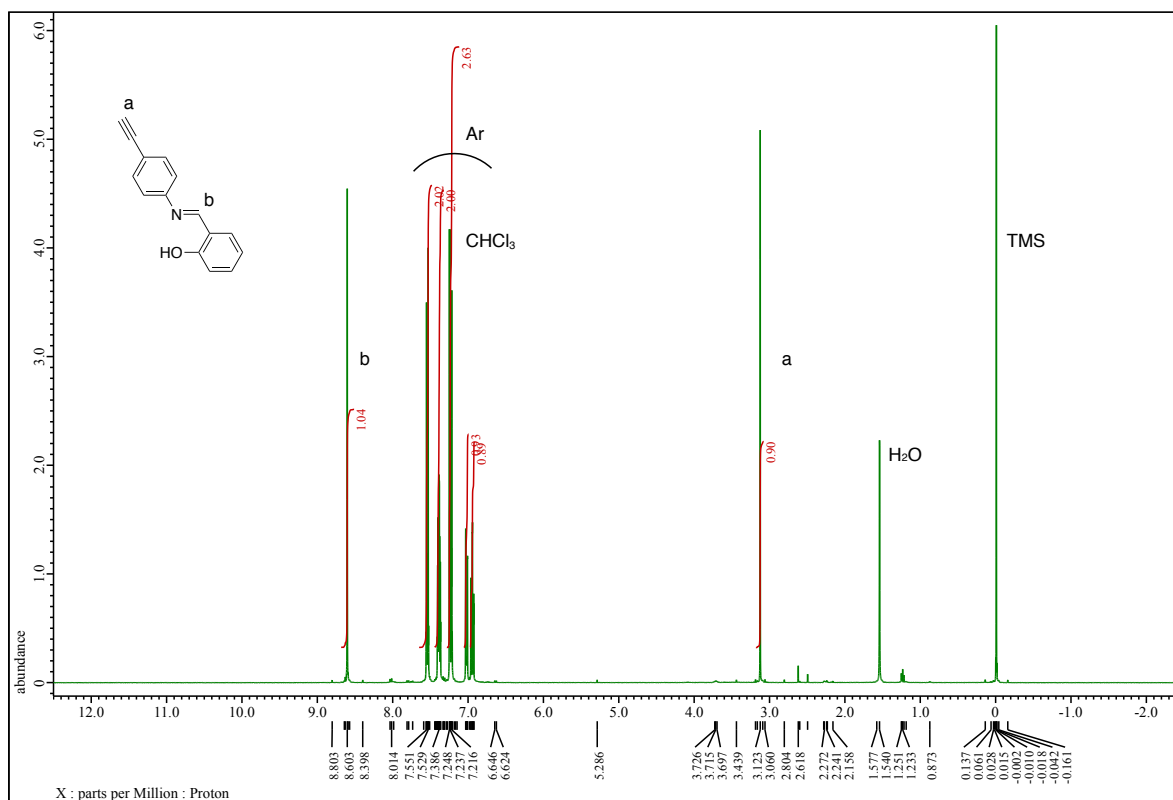

**Fig. S1** <sup>1</sup>H NMR spectrum of **1** measured at 400 MHz in CDCl<sub>3</sub> at 25 °C.

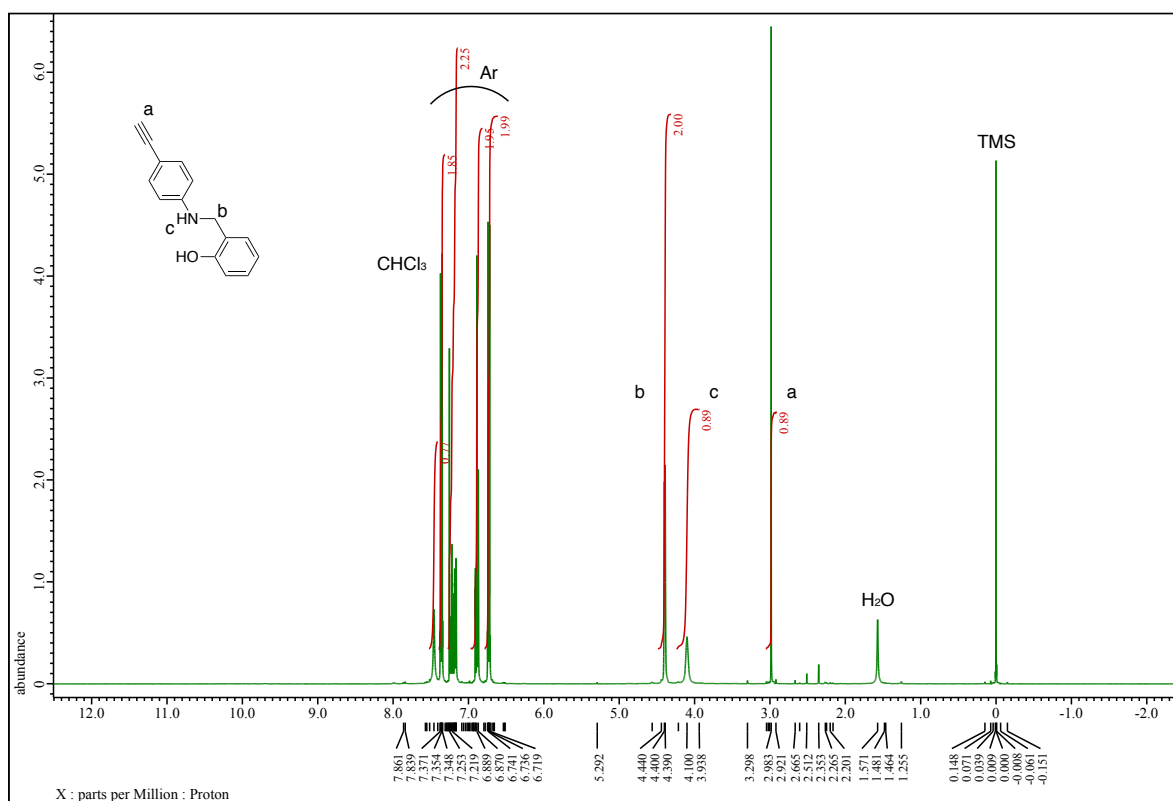

**Fig. S2** <sup>1</sup>H NMR spectrum of **2** measured at 400 MHz in CDCl<sub>3</sub> at 25 °C.

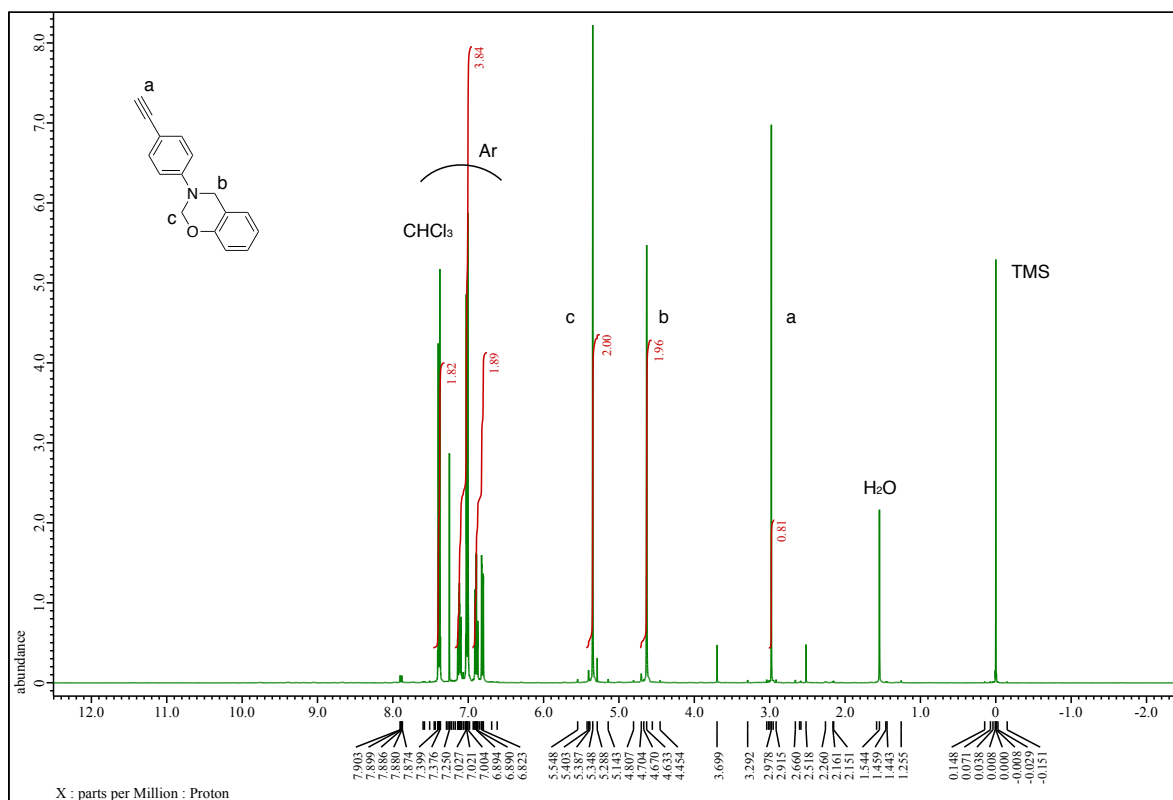

**Fig. S3**  $^1\text{H}$  NMR spectrum of **6** measured at 400 MHz in  $\text{CDCl}_3$  at 25 °C.

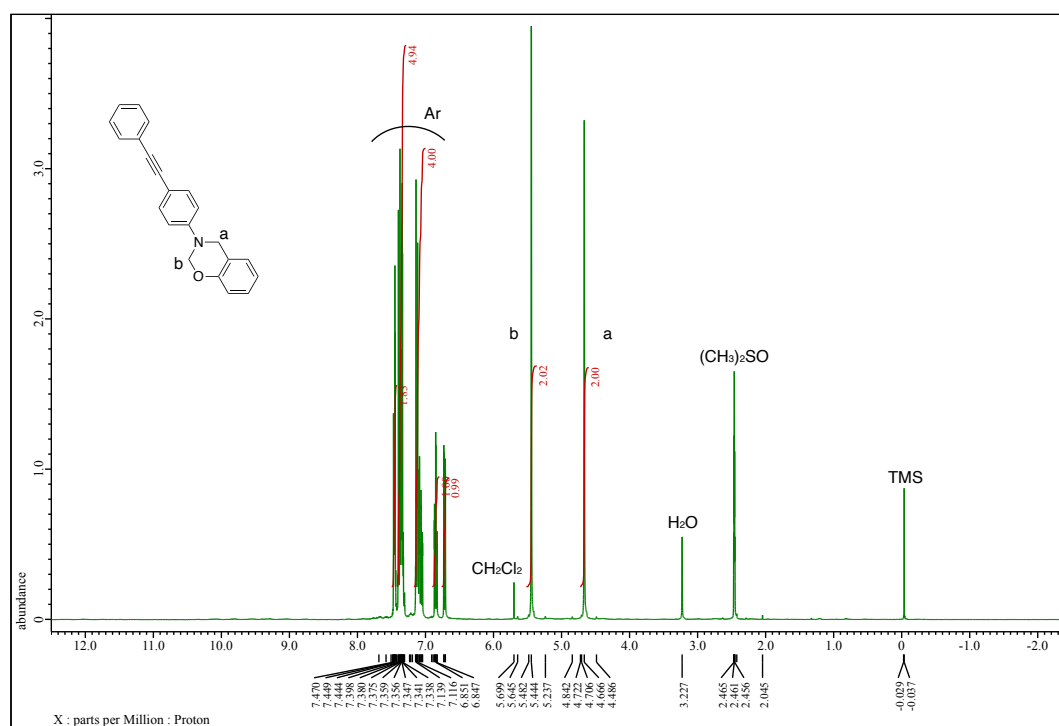

**Fig. S4**  $^1\text{H}$  NMR spectrum of **1** measured at 400 MHz in  $\text{DMSO}-d_6$  at 25 °C.

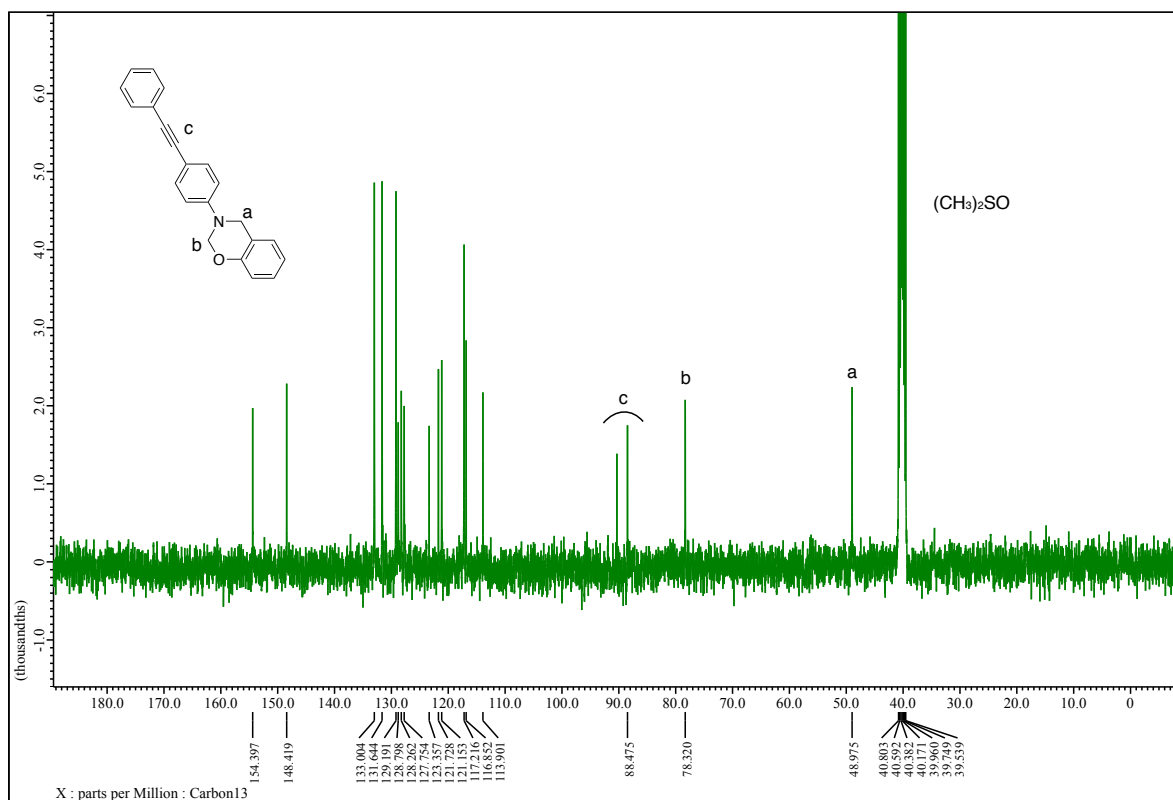

**Fig. S5**  $^{13}\text{C}$  NMR spectrum of **1** measured at 100 MHz in  $\text{DMSO-}d_6$  at 25 °C.

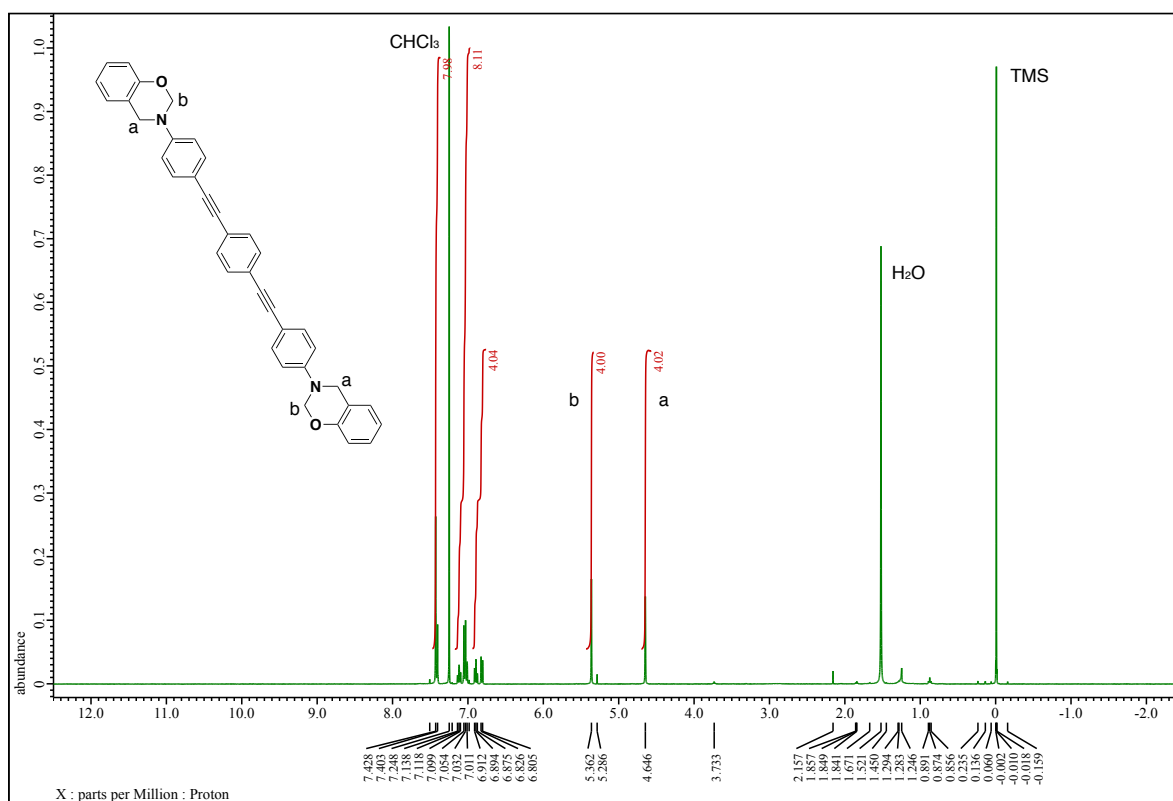

**Fig. S6**  $^1\text{H}$  NMR spectrum of **2** measured at 400 MHz in  $\text{CHCl}_3$  at 25 °C.

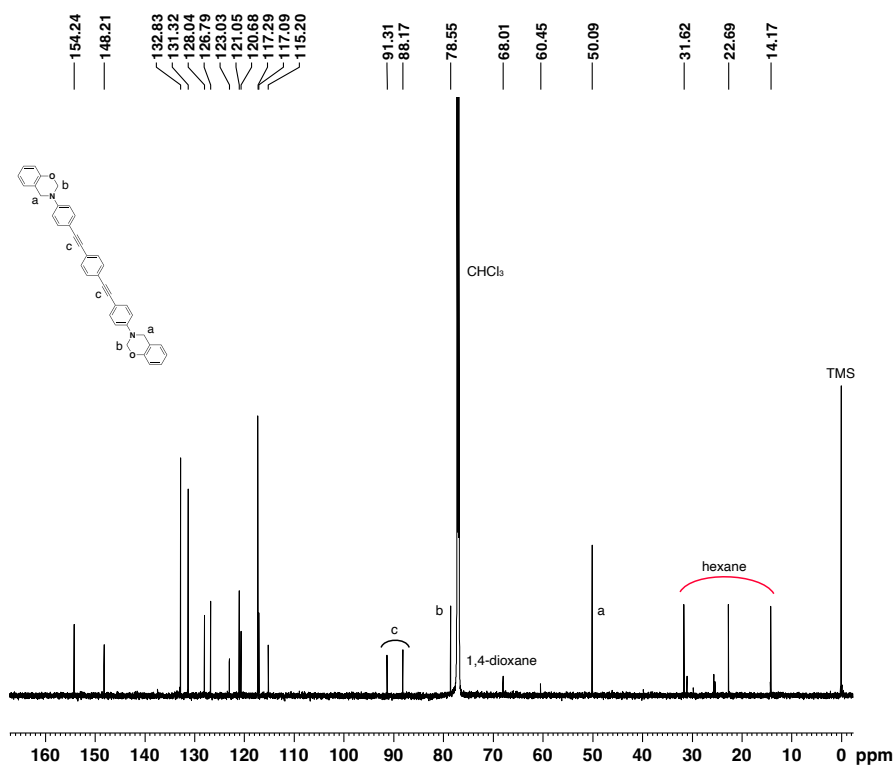

**Fig. S7** <sup>13</sup>C NMR spectrum of **2** measured at 175 MHz in CHCl<sub>3</sub> at 25 °C.

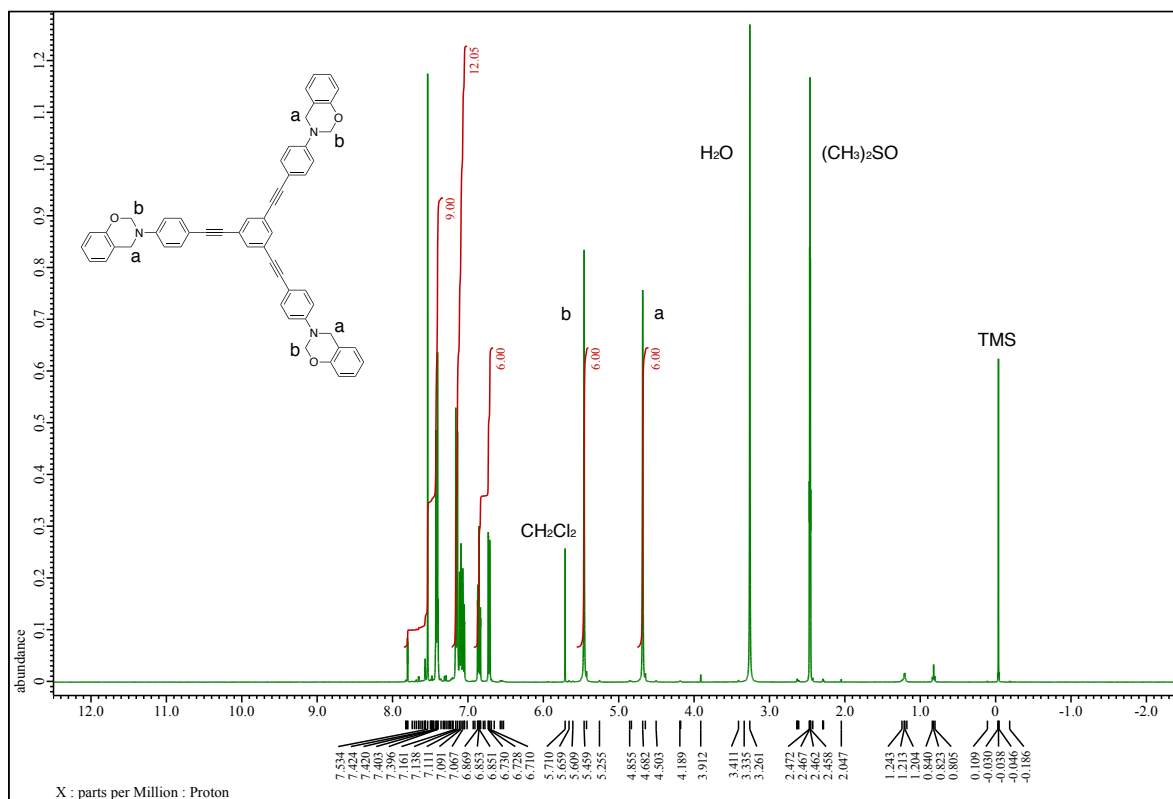

**Fig. S8** <sup>1</sup>H NMR spectrum of **3** measured at 400 MHz in DMSO-*d*<sub>6</sub> at 25 °C.

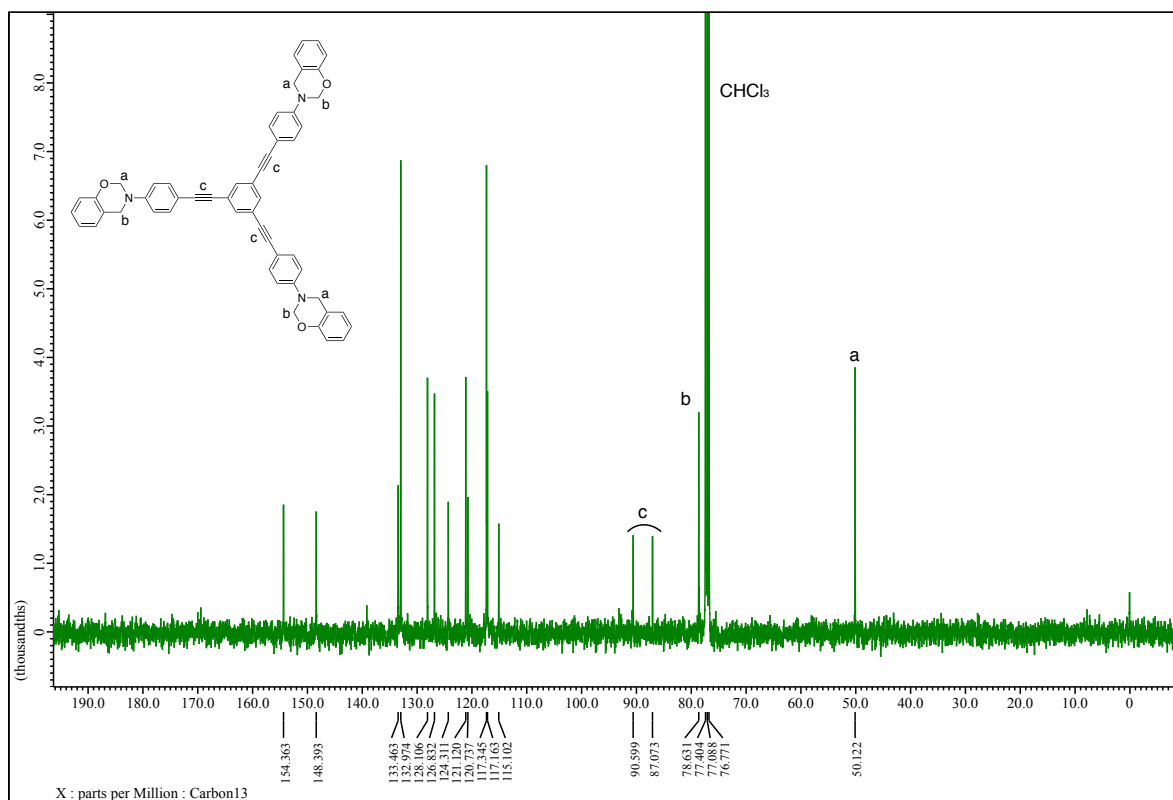

**Fig. S9**  $^{13}\text{C}$  NMR spectrum of **3** measured at 100 MHz in  $\text{CDCl}_3$  at 25 °C.

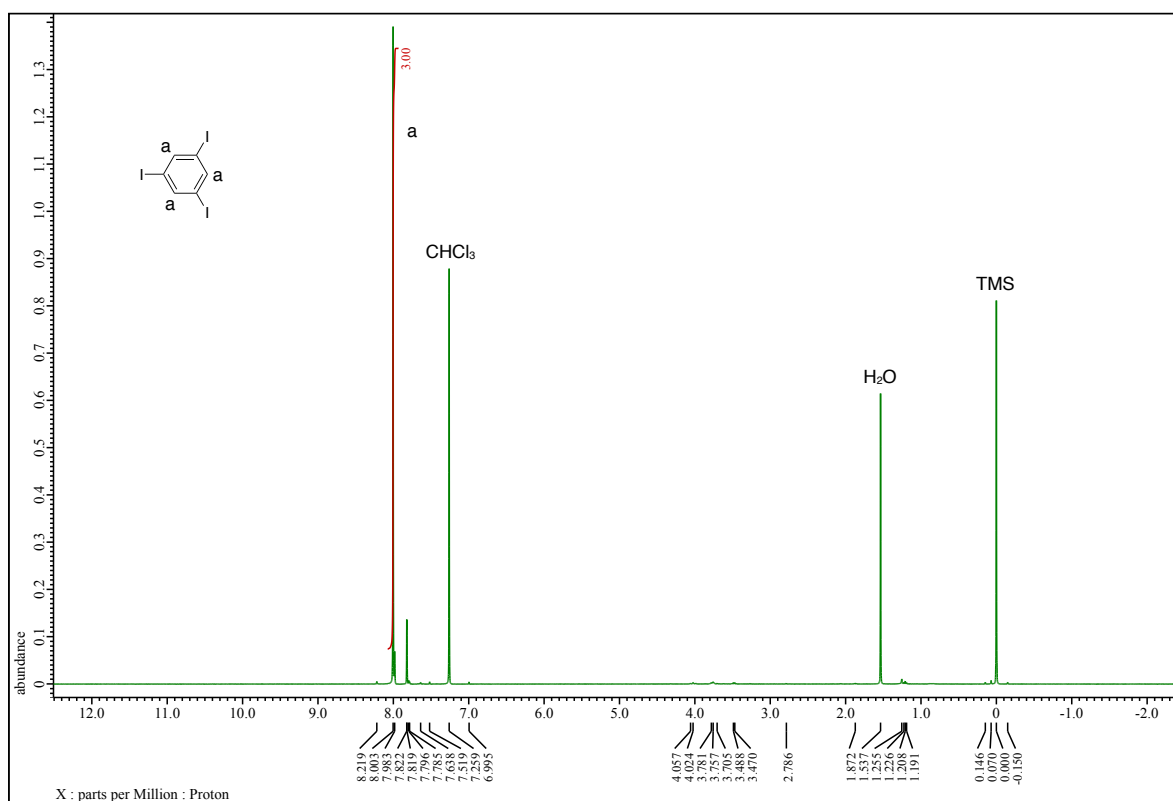

**Fig. S10**  $^1\text{H}$  NMR spectrum of 1,3,5-triiodobenzene measured at 100 MHz in  $\text{CDCl}_3$  at 25 °C.

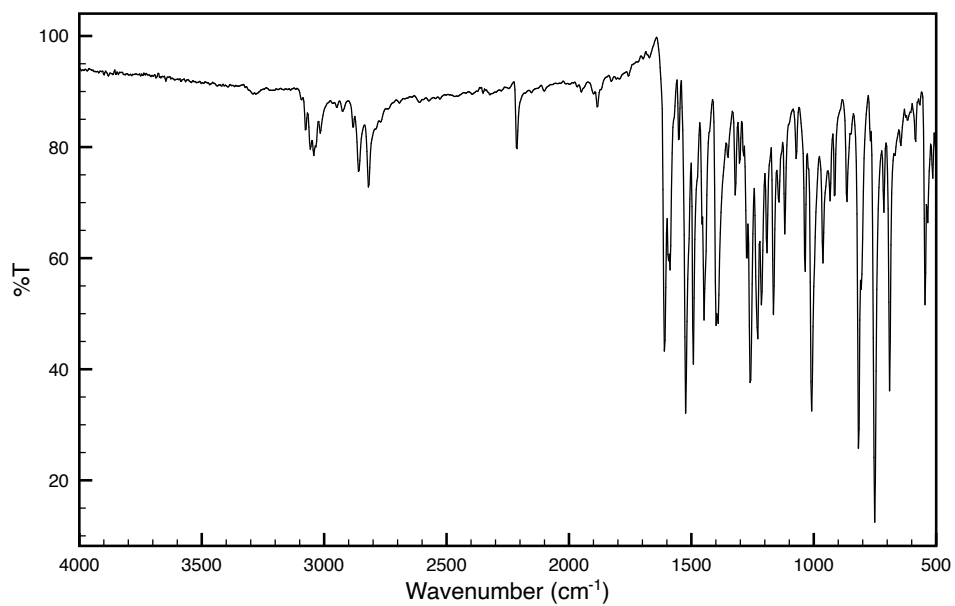

**Fig. S11** IR absorption spectrum (KBr pellet) of **1**.

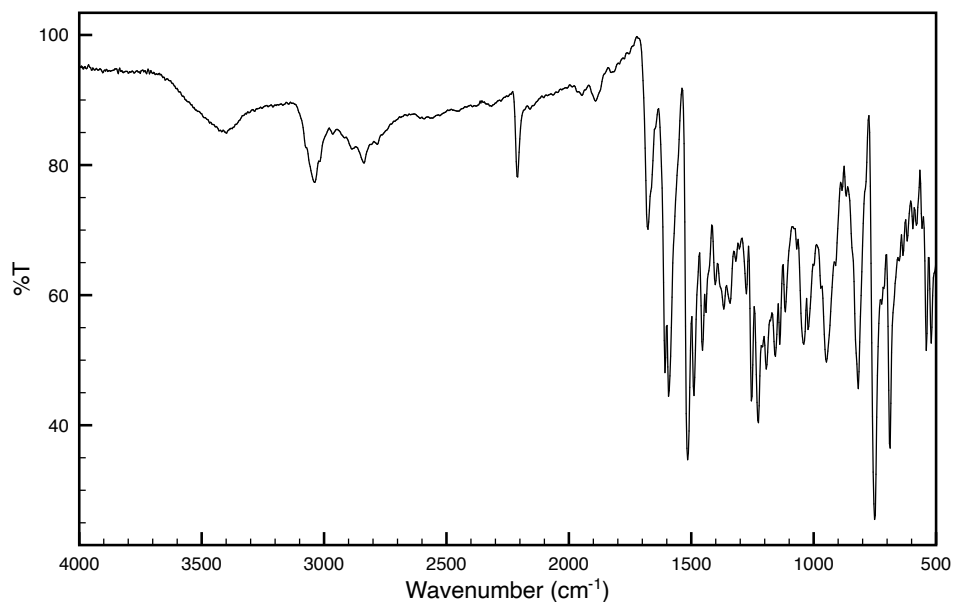

**Fig. S12** IR absorption spectrum (KBr pellet) of a resin obtained by curing of **1** at 150 °C.

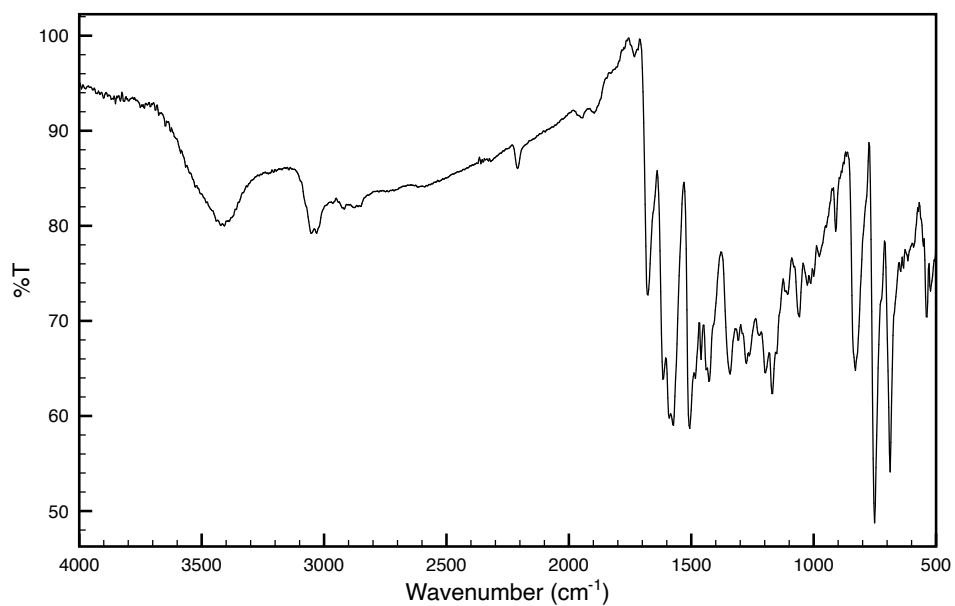

**Fig. S13** IR absorption spectrum (KBr pellet) of a resin obtained by curing of **1** at 200 °C.

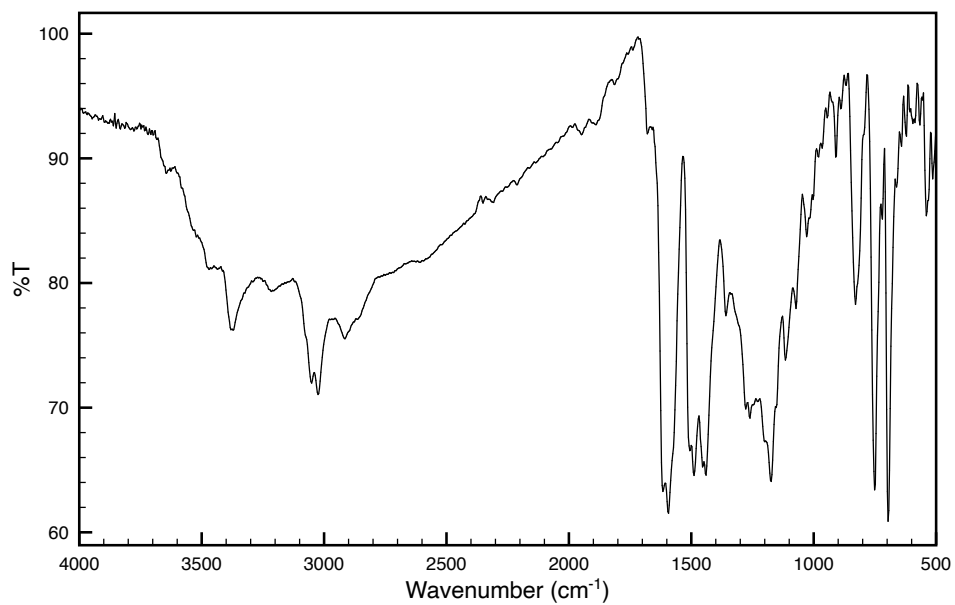

**Fig. S14** IR absorption spectrum (KBr pellet) of a resin obtained by curing of **1** at 250 °C.



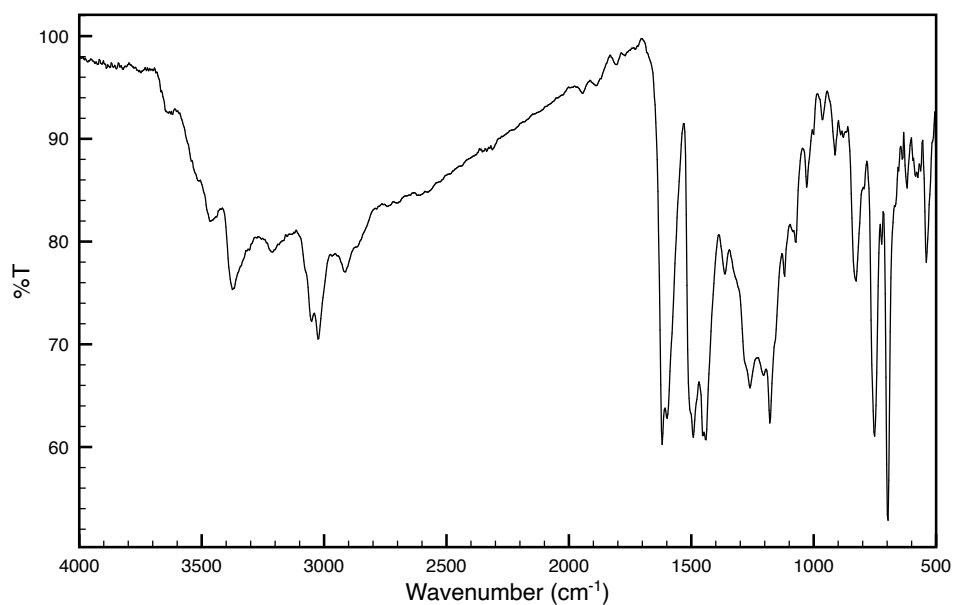

**Fig. S15** IR absorption spectrum (KBr pellet) of a resin obtained by curing of **1** at 300 °C.

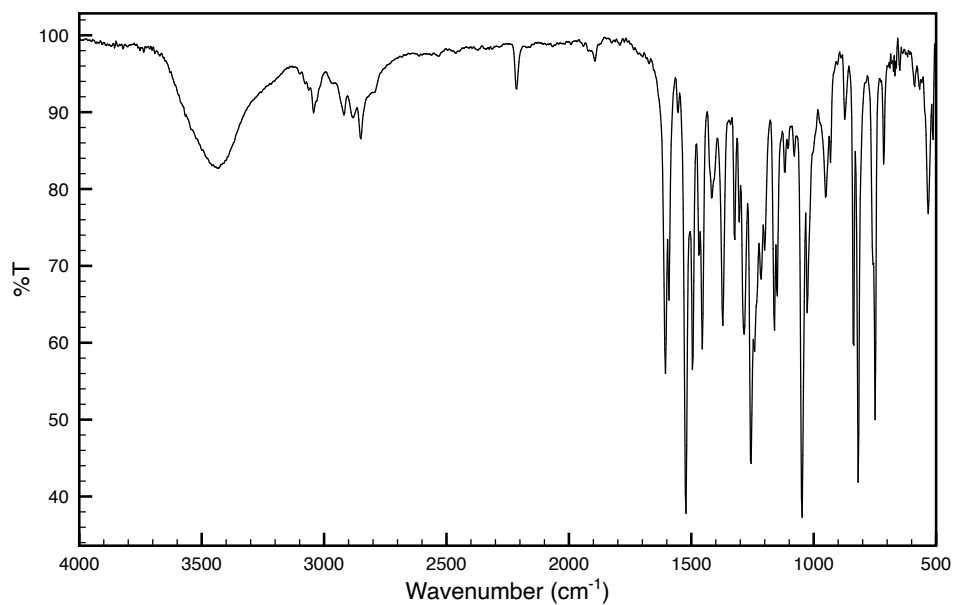

**Fig. S16** IR absorption spectrum (KBr pellet) of **2**.

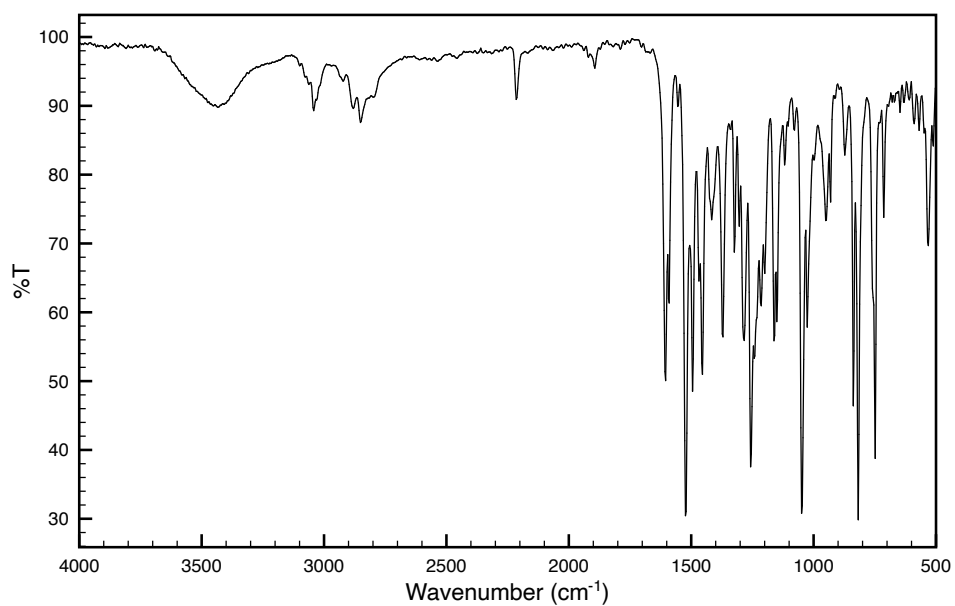

**Fig. S17** IR absorption spectrum (KBr pellet) of a resin obtained by curing of **2** at 150 °C.

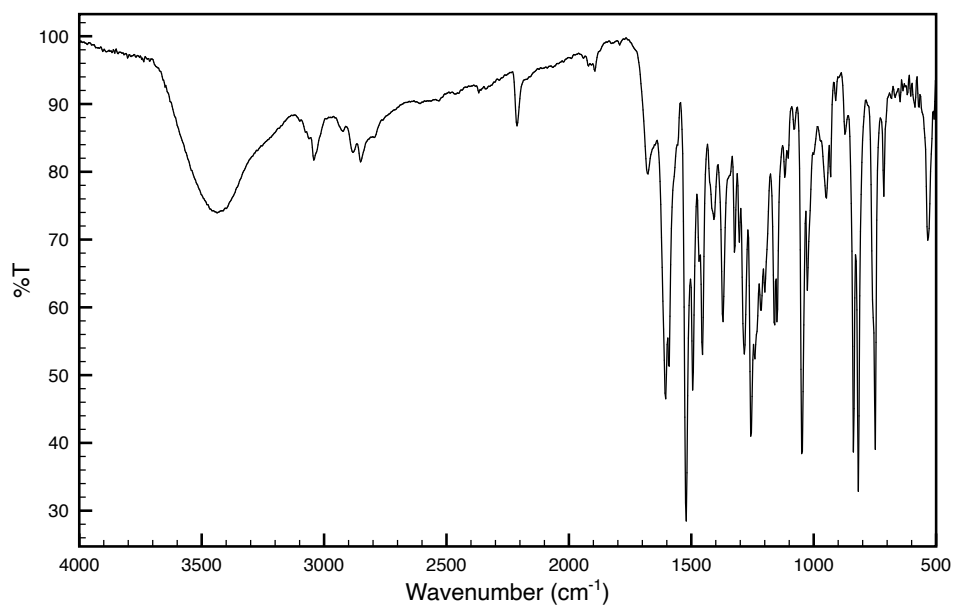

**Fig. S18** IR absorption spectrum (KBr pellet) of a resin obtained by curing of **2** at 200 °C.

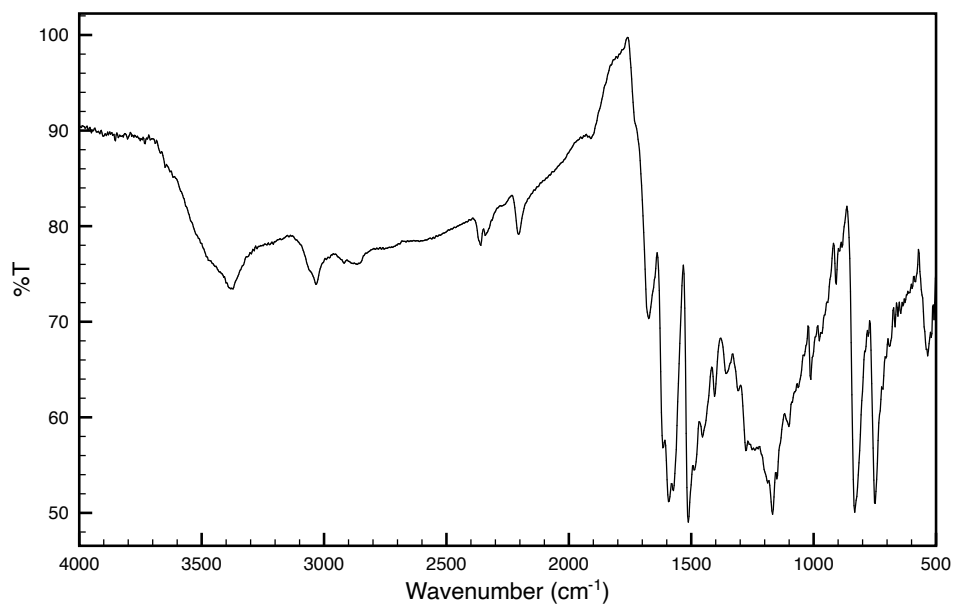

**Fig. S19** IR absorption spectrum (KBr pellet) of a resin obtained by curing of **2** at 250 °C.

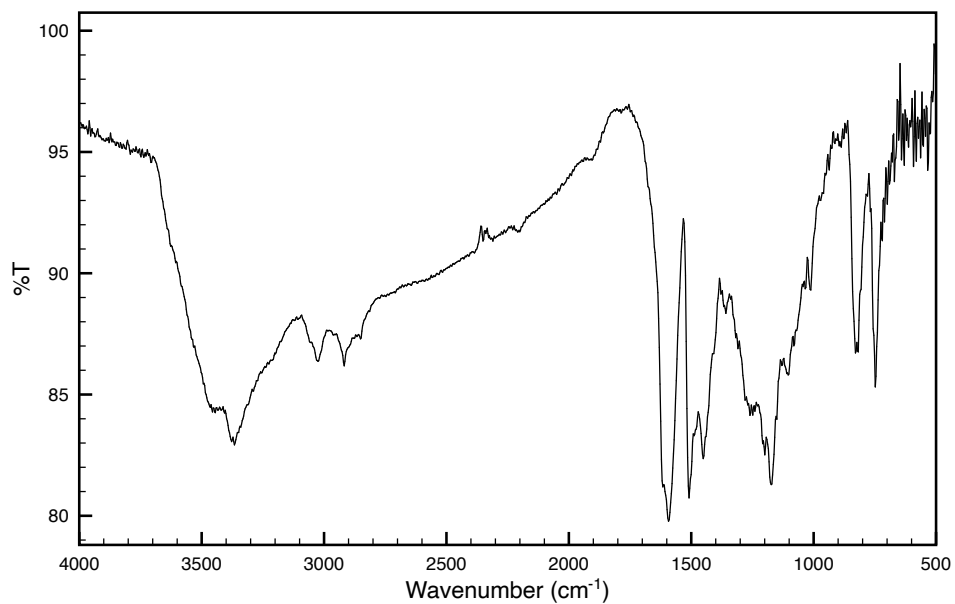

**Fig. S20** IR absorption spectrum (KBr pellet) of a resin obtained by curing of **2** at 300 °C.

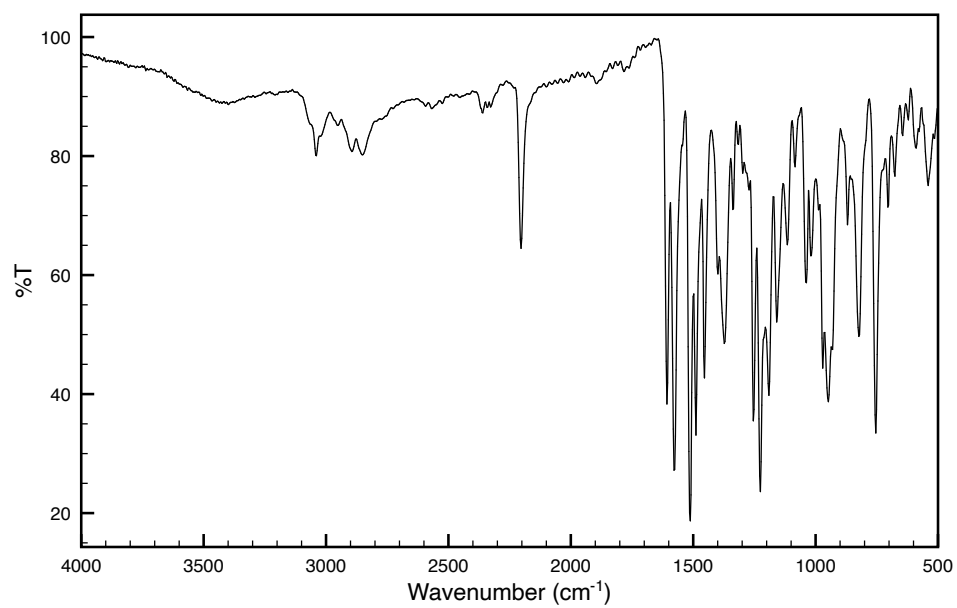

**Fig. S21** IR absorption spectrum (KBr pellet) of **3**.

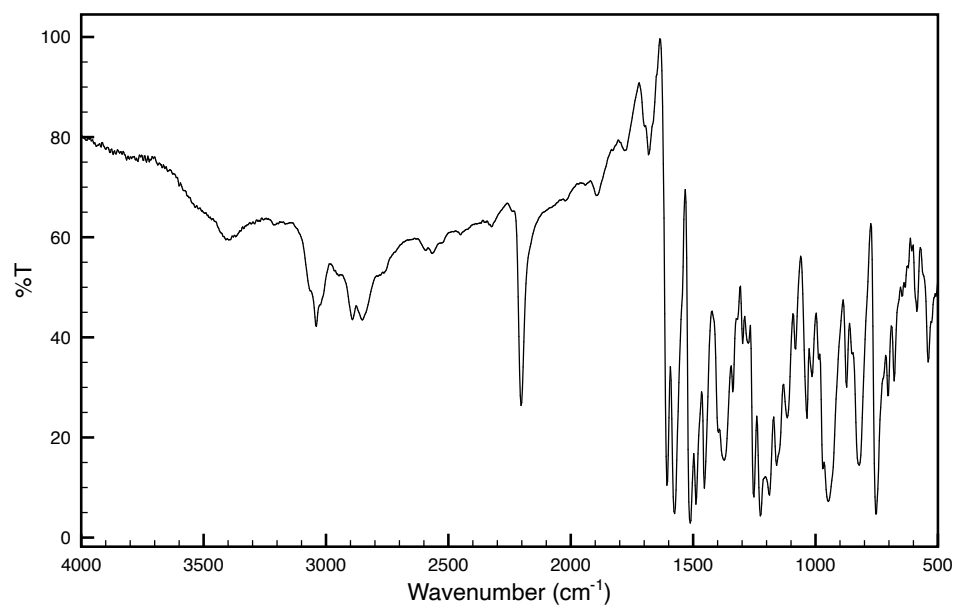

**Fig. S22** IR absorption spectrum (KBr pellet) of a resin obtained by curing of **3** at 150 °C.

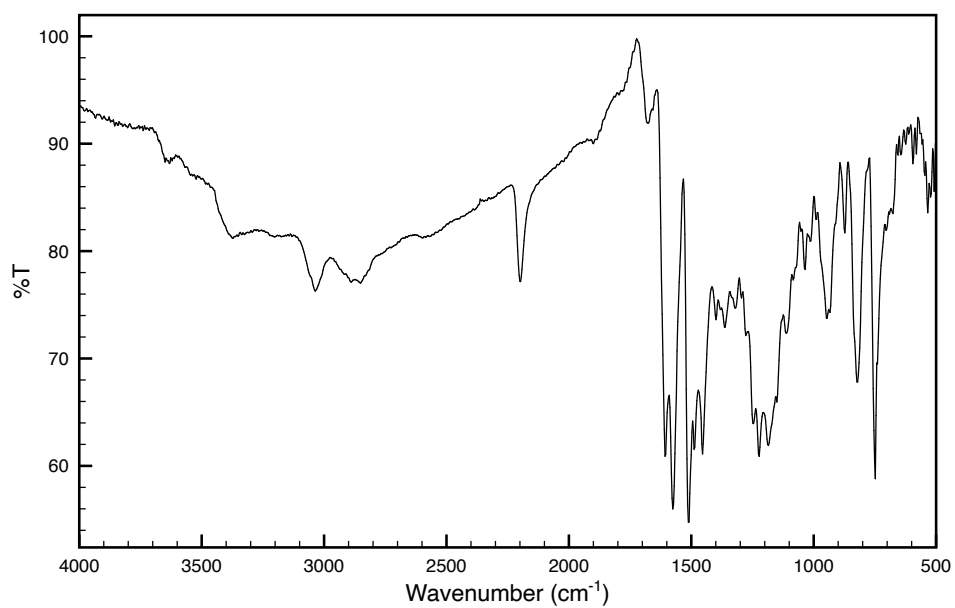

**Fig. S23** IR absorption spectrum (KBr pellet) of a resin obtained by curing of **3** at 200 °C.

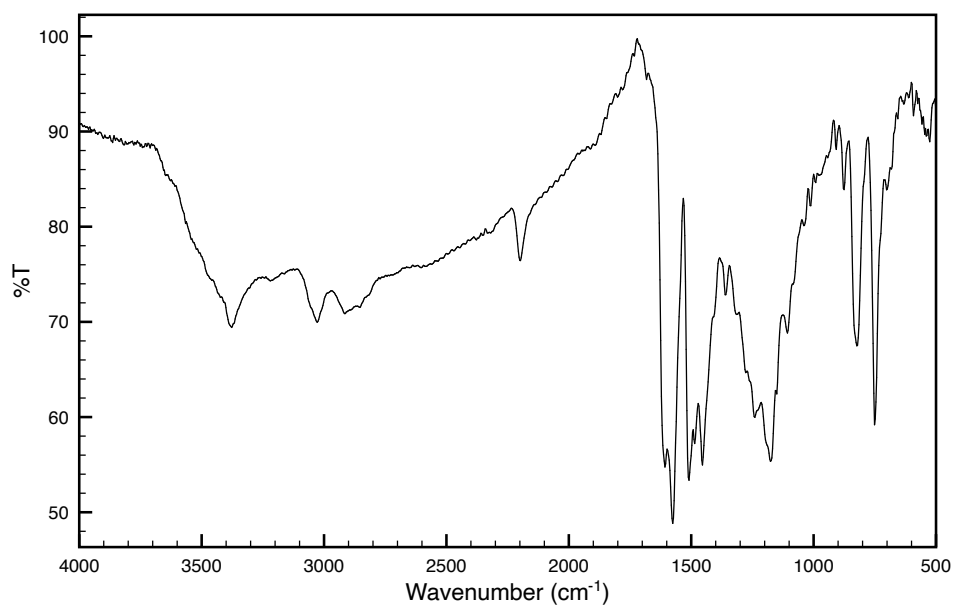

**Fig. S24** IR absorption spectrum (KBr pellet) of a resin obtained by curing of **3** at 250 °C.

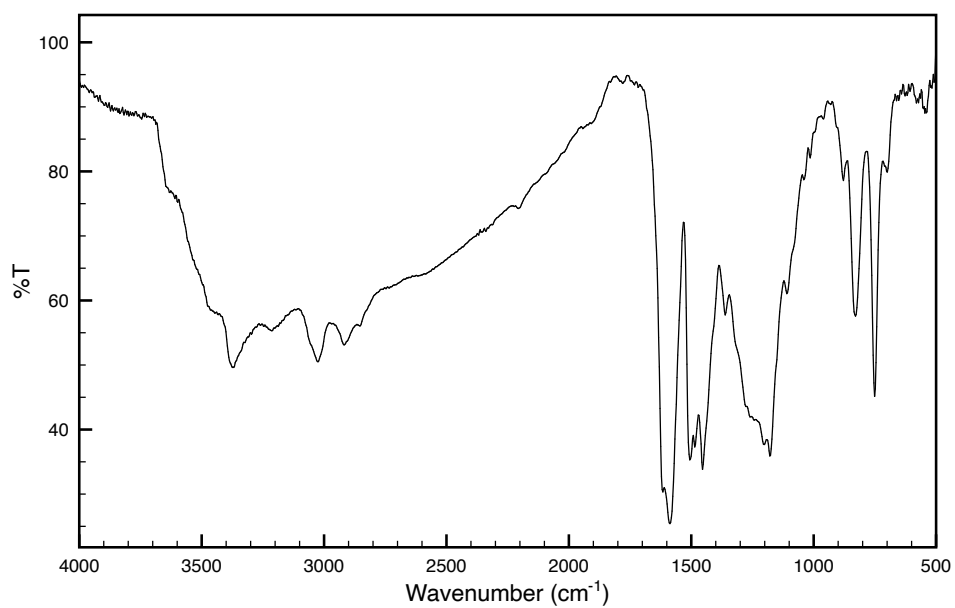

**Fig. S25** IR absorption spectrum (KBr pellet) of a resin obtained by curing of **3** at 300 °C.

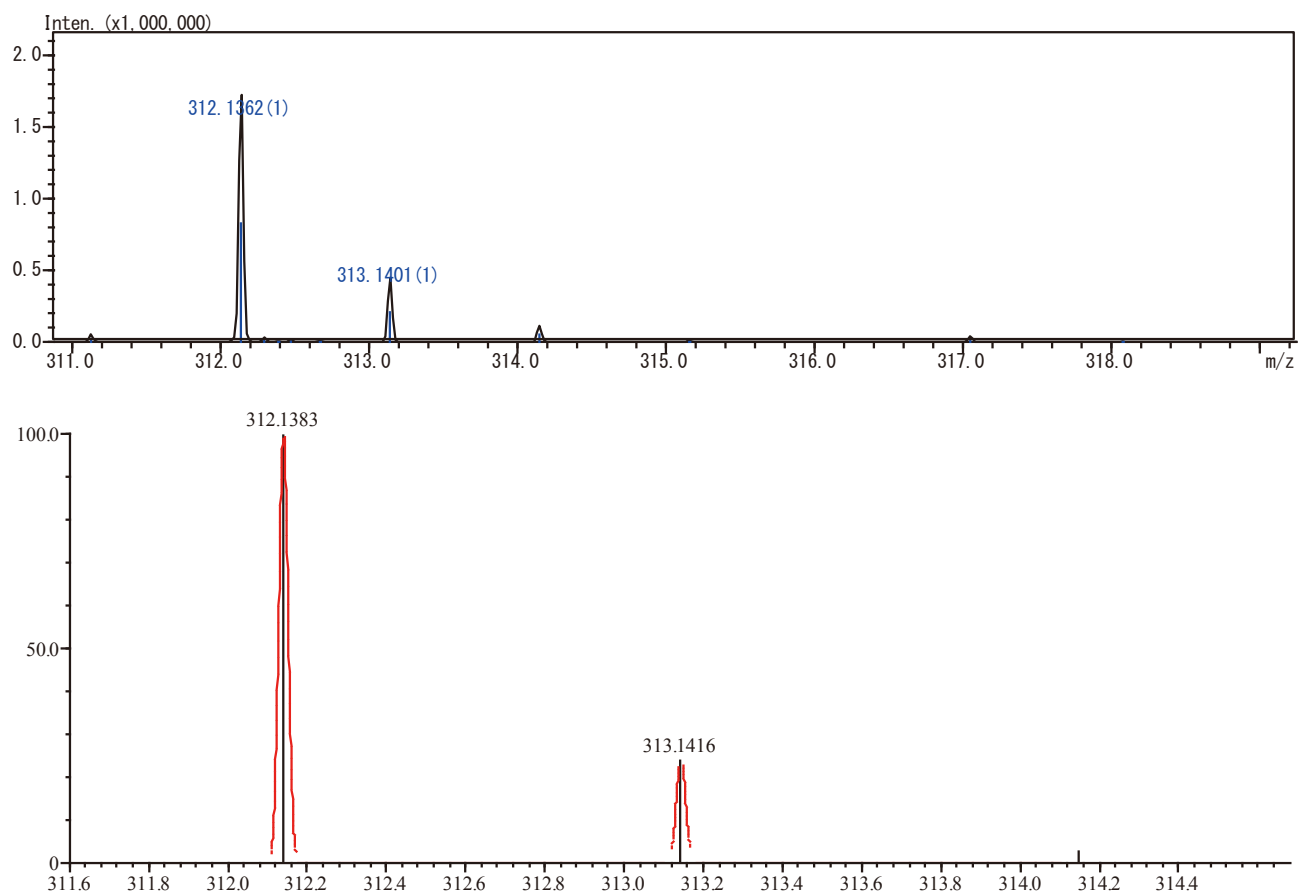

**Fig. S26** ESI-TOF-MS of **1**; (top) found, (bottom) calcd.

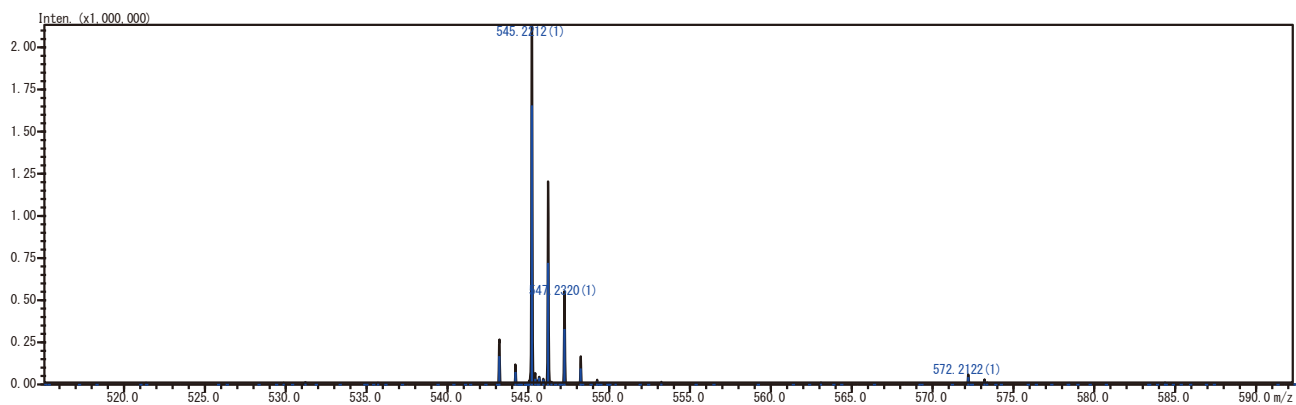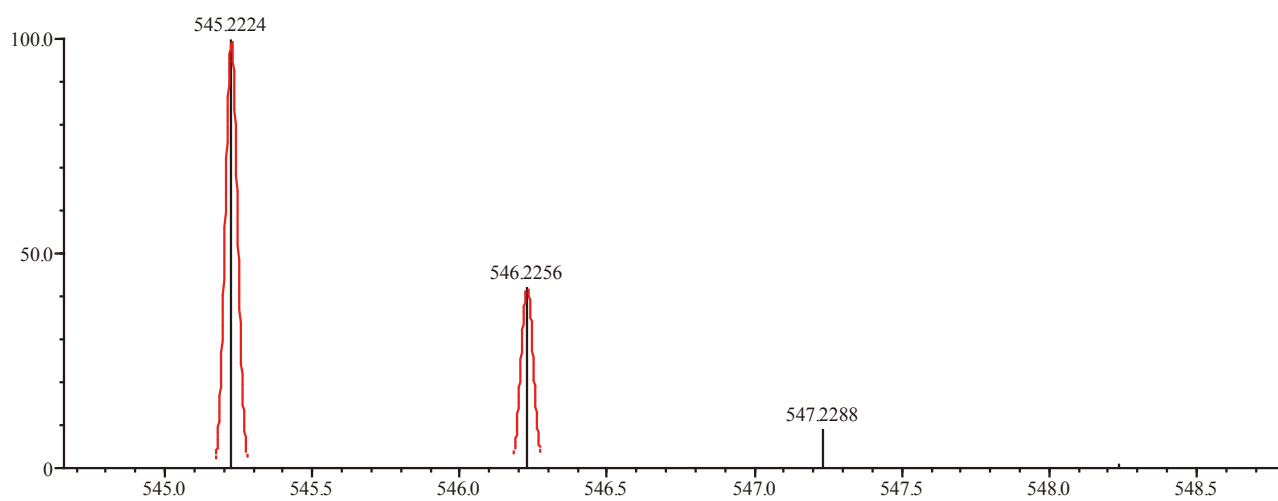

**Fig. S27** ESI-TOF-MS of **2**; (top) found, (bottom) calcd.



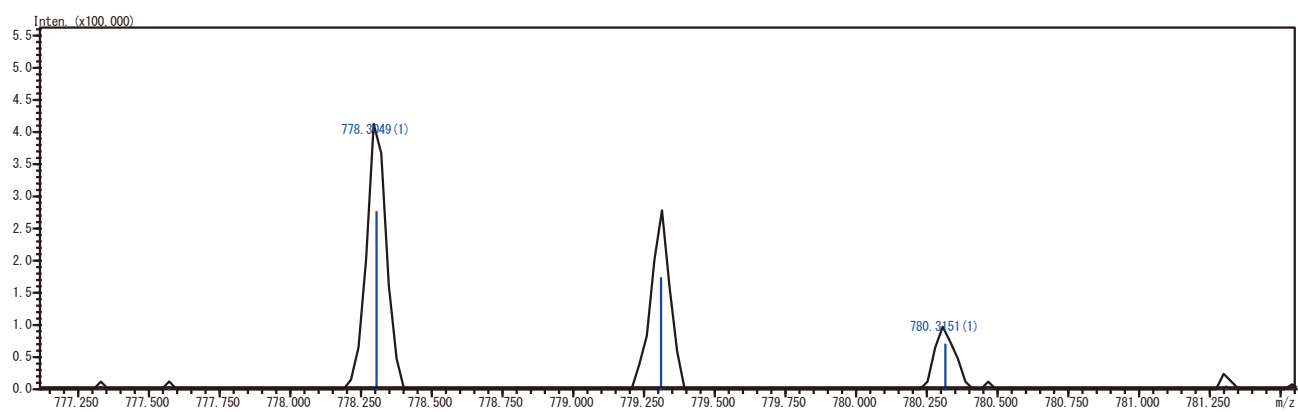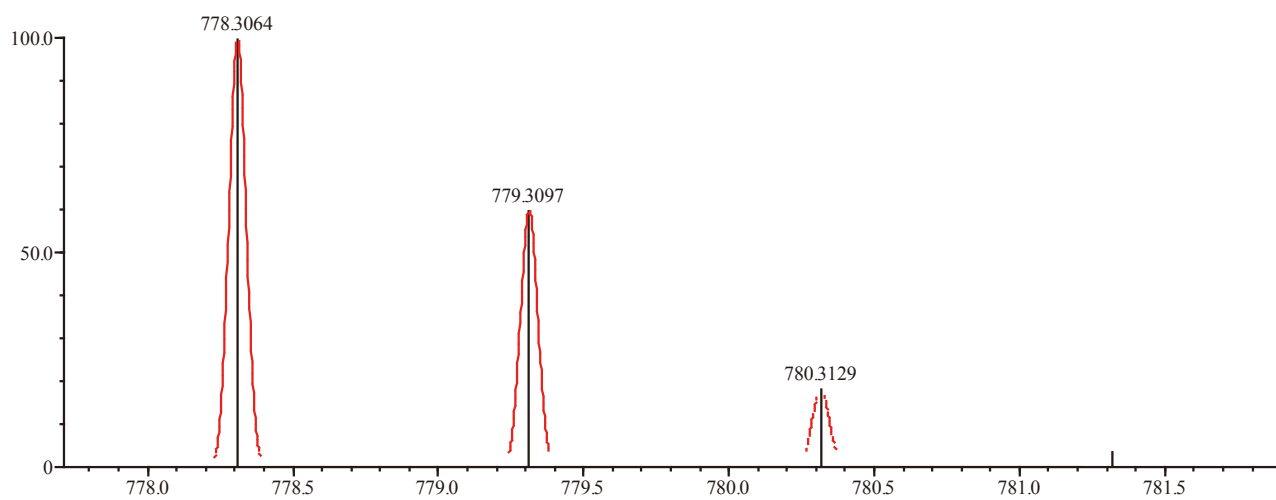

**Fig. S28** ESI-TOF-MS of **3**; (top) found, (bottom) calcd.

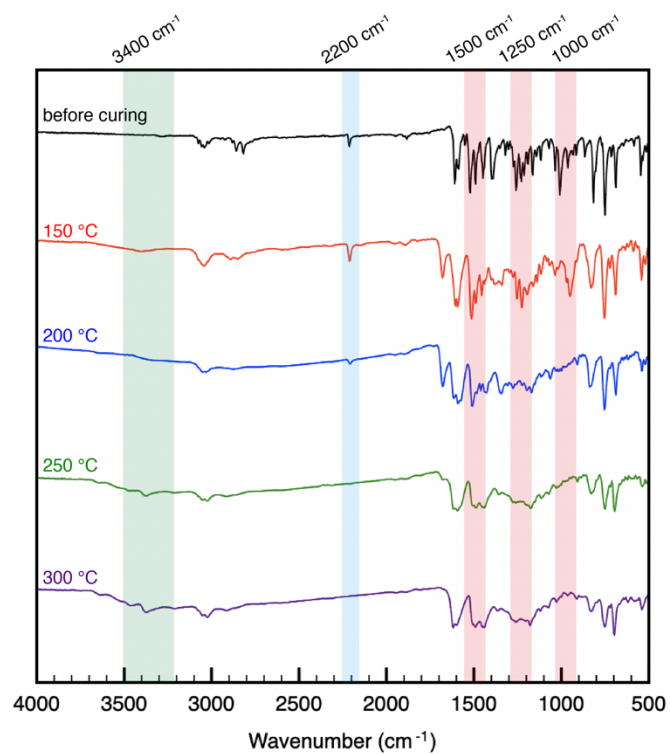

**Fig. S29** IR absorption spectra of **1** and resins obtained by curing of **1** at 150–300 °C for 2 h. The peak at 1650  $\text{cm}^{-1}$  is assignable to C=N bond in the Schiff base structure formed during the ring-opening process.<sup>S16</sup>

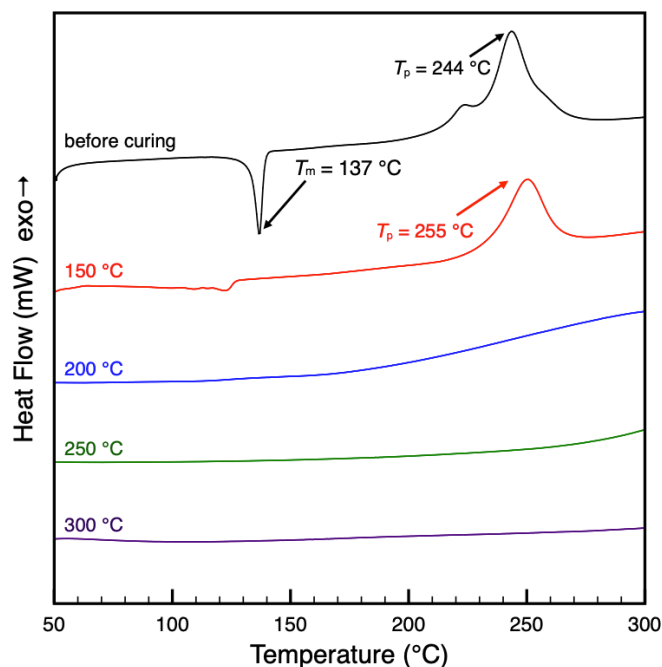

**Fig. S30** DSC thermograms of **1** and resins obtained by curing of **1** at 150–300 °C for 2 h.

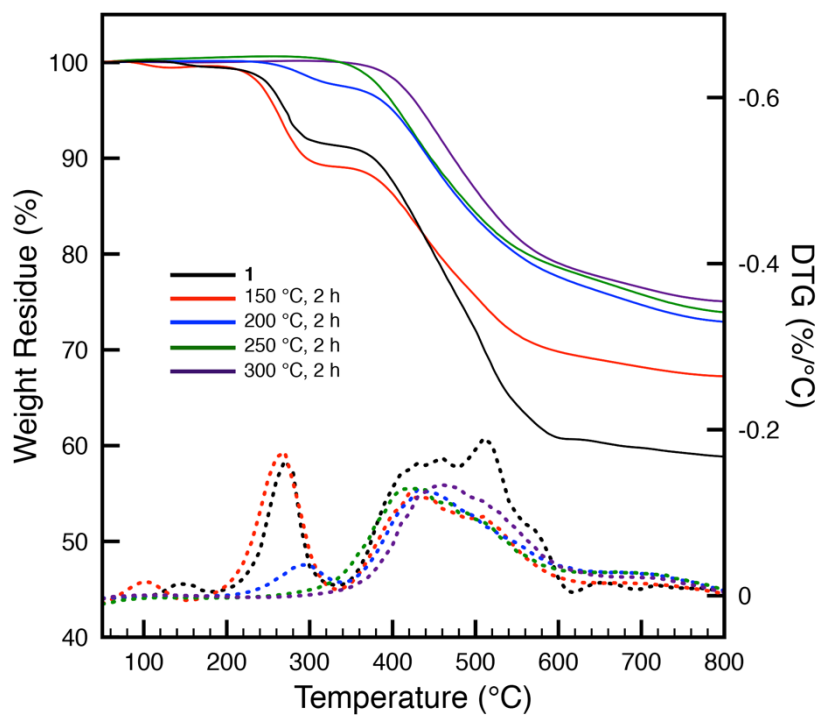

**Fig. S31** TGA traces and DTG (dashed line) of **1** and resins obtained by curing of **1** at 150–300 °C for 2 h.

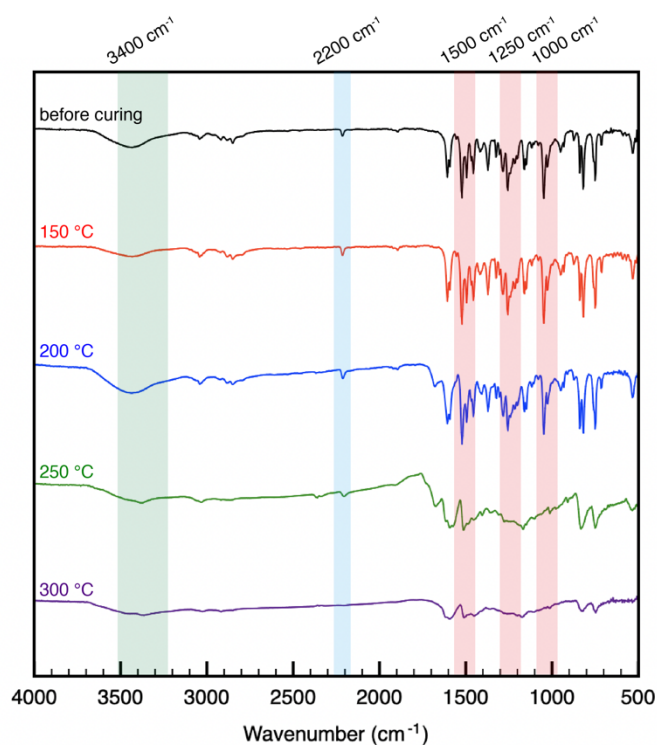

**Fig. S32** IR absorption spectra of **2** and resins obtained by curing of **2** at 150–300 °C for 2 h. The peak at 1650  $\text{cm}^{-1}$  is assignable to C=N bond in the Schiff base structure formed during the ring-opening process.<sup>S16</sup>

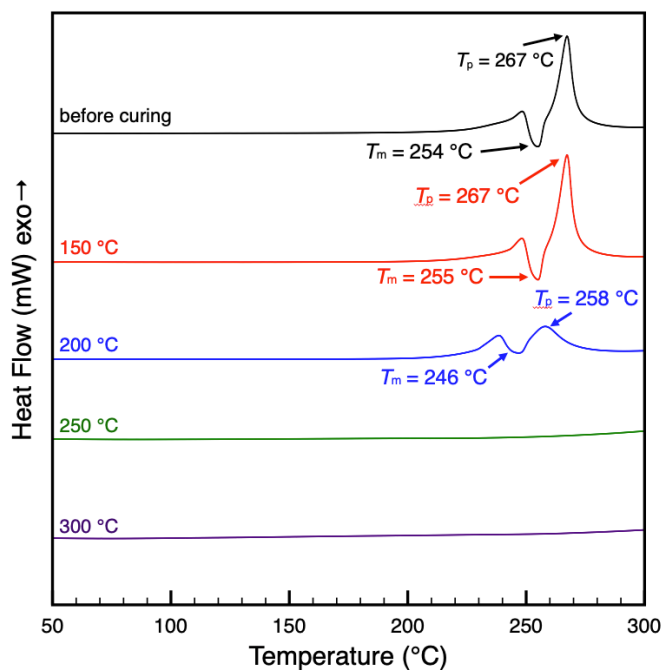

**Fig. S33** DSC thermograms of **2** and resins obtained by curing of **2** at 150–300 °C for 2 h.

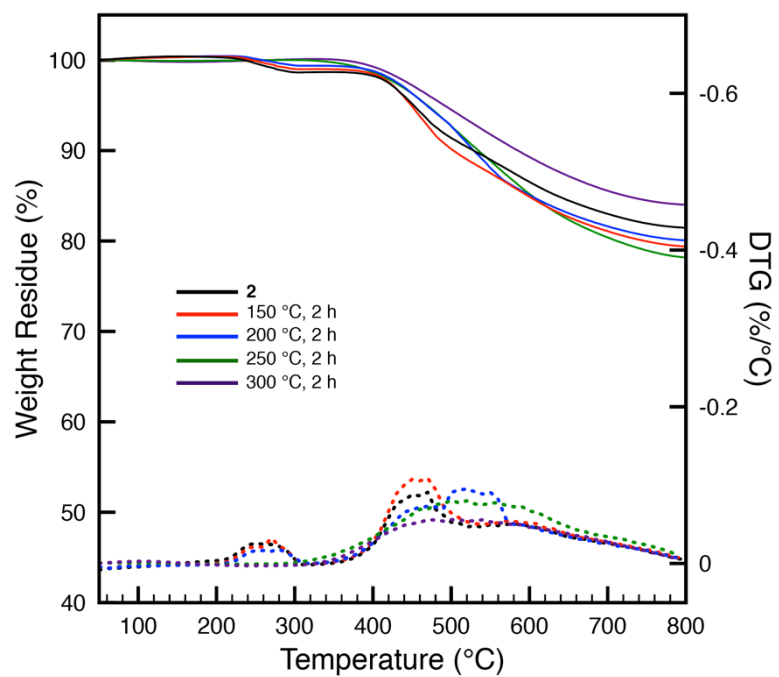

**Fig. S34** TGA traces and DTG (dashed line) of **2** and resins obtained by curing of **2** at 150–300 °C for 2 h.

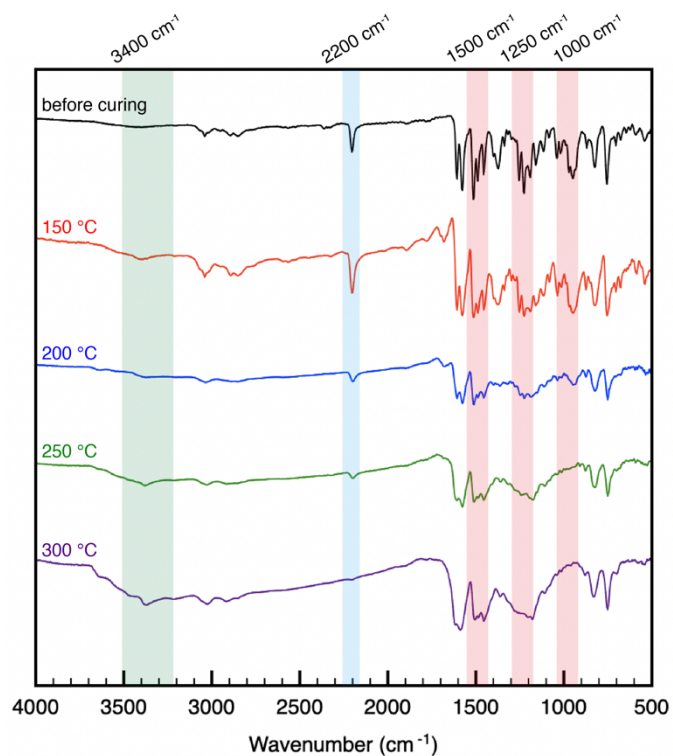

**Fig. S35** IR absorption spectra of **3** and resins obtained by curing of **3** at 150–300 °C for 2 h. The peak at 1650 cm<sup>-1</sup> is assignable to C=N bond in the Schiff base structure formed during the ring-opening process.<sup>S16</sup>

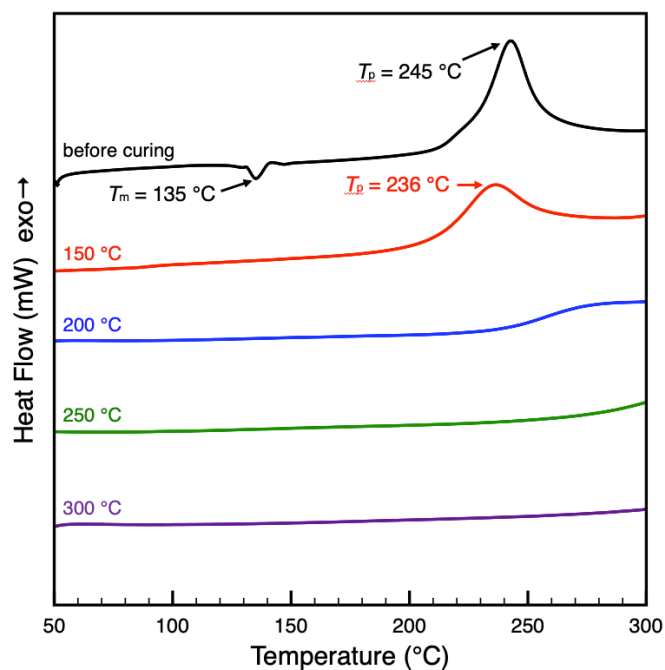

**Fig. S36** DSC thermograms of **3** and resins obtained by curing of **3** at 150–300 °C for 2 h.

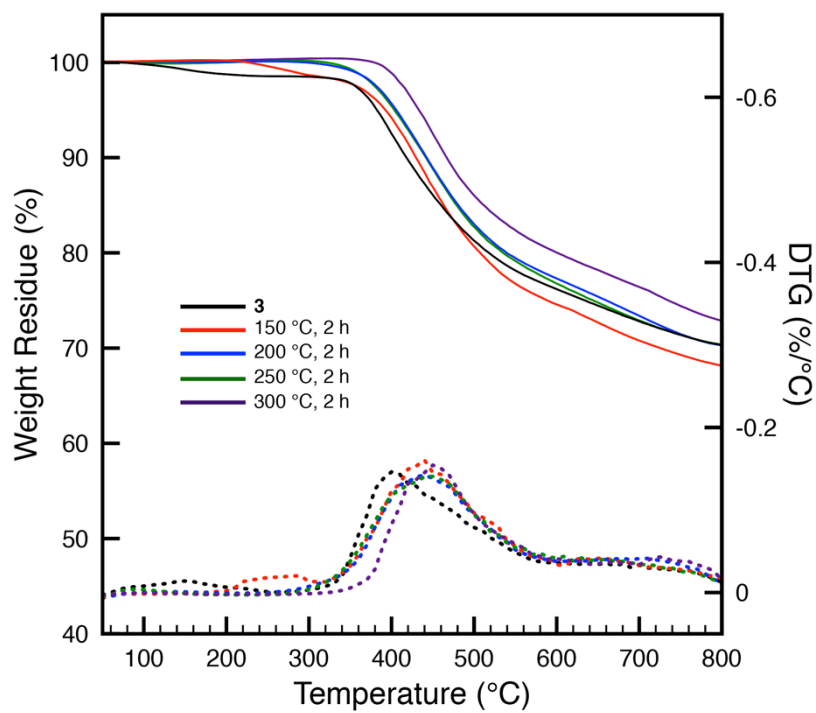

**Fig. S37** TGA traces and DTG (dashed line) of **3** and resins obtained by curing of **3** at 150–300 °C for 2 h.

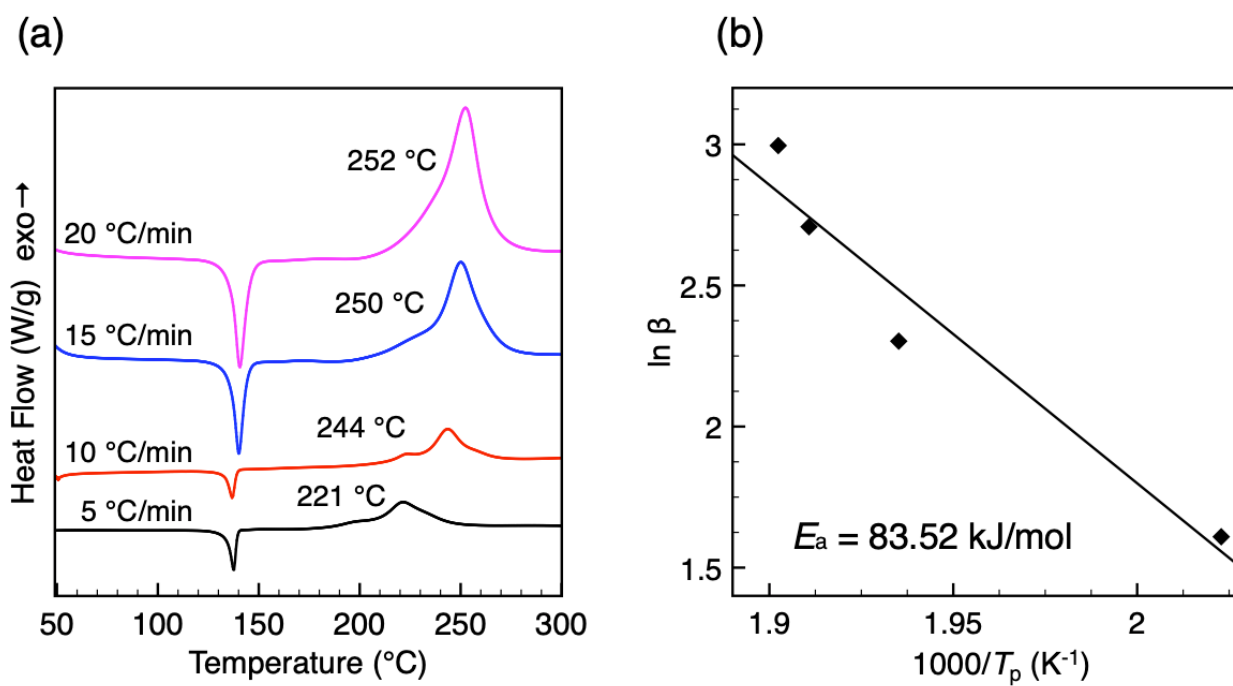

**Fig. S38** (a) DSC thermograms of **1** at various heating rates. (b) Ozawa-Flynn-Wall plot for the data of (a). Correlation coefficient  $r = 0.9408$ .



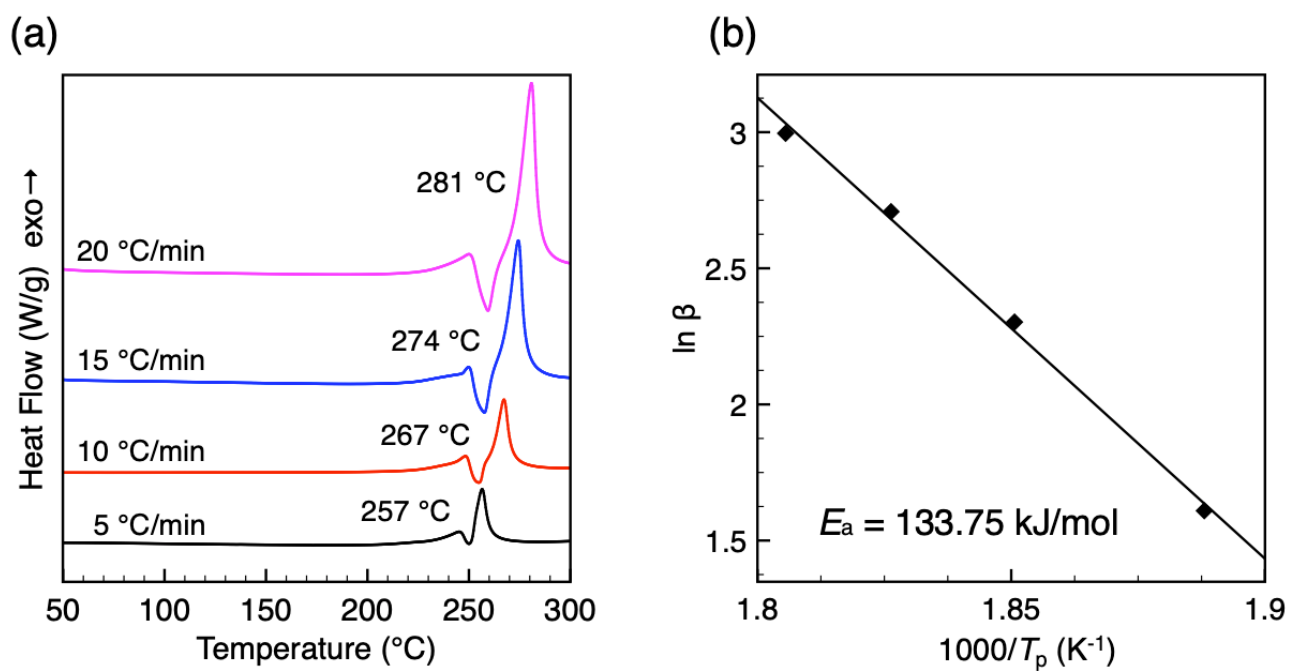

**Fig. S39** (a) DSC thermograms of **2** at various heating rates. (b) Ozawa-Flynn-Wall plot for the data of (a). Correlation coefficient  $r = 0.9964$ .

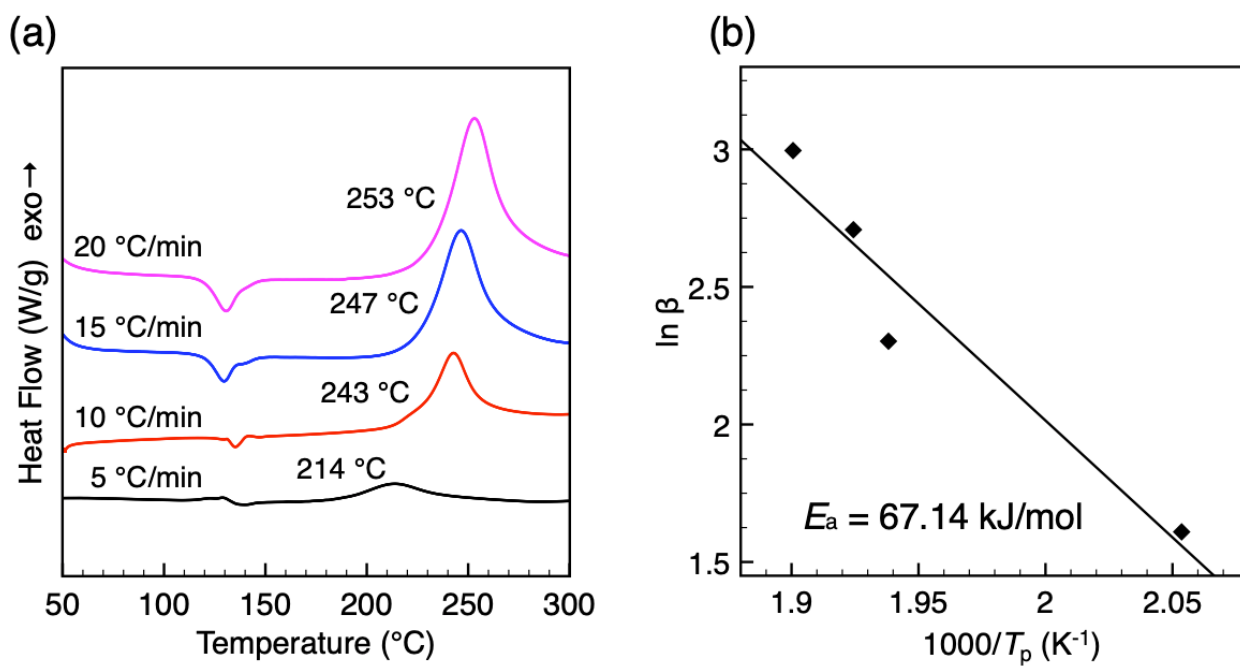

**Fig. S40** (a) DSC thermograms of **3** at various heating rates. (b) Ozawa–Flynn–Wall plot for the data of (a). Correlation coefficient  $r = 0.9261$ .

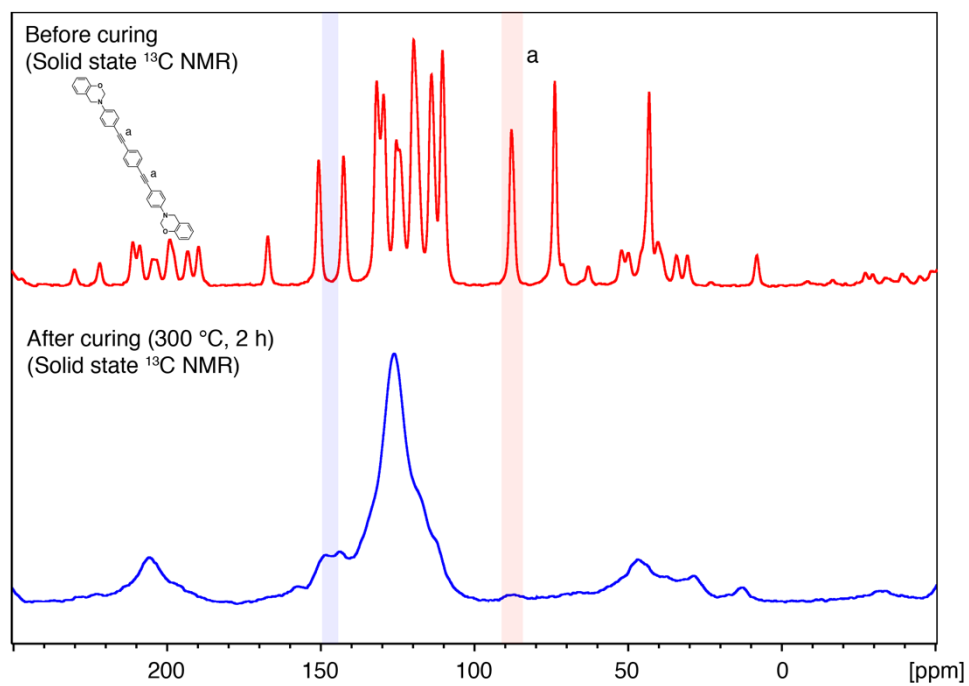

**Fig. S41**  $^{13}\text{C}$  CP/MAS NMR spectra of **2** (top) and resin obtained by curing of **2** at 300 °C (bottom).

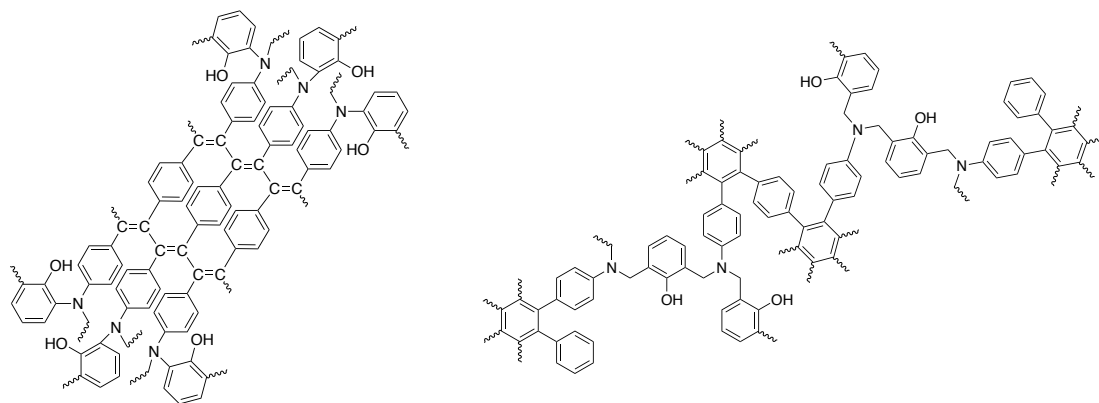

**Fig. S42** Deduced structures of **2** (left) and resin formed by curing of **2** (right).

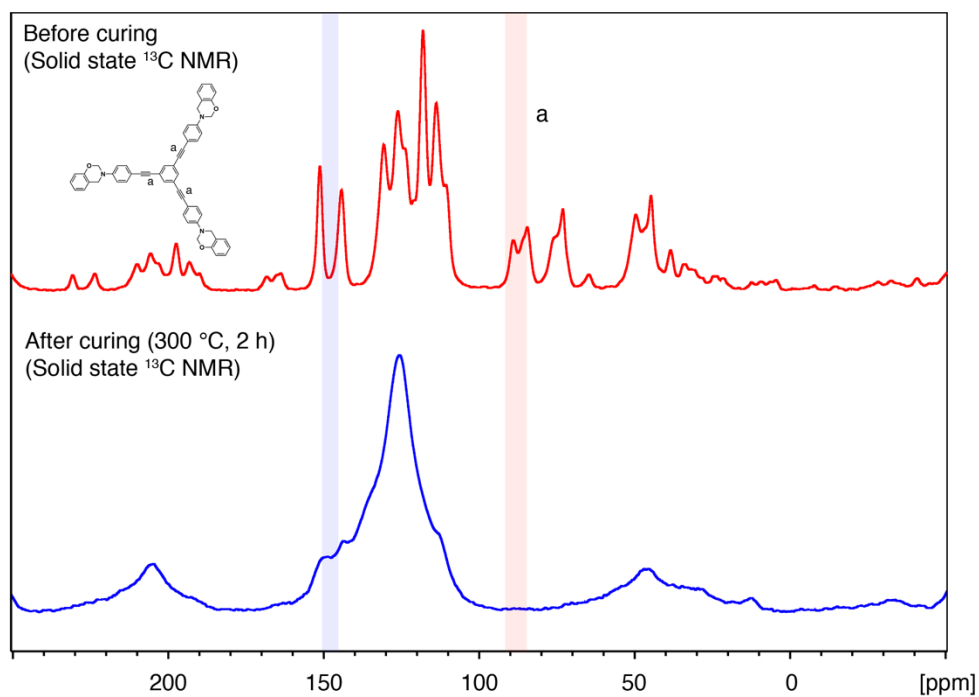

**Fig. S43**  $^{13}\text{C}$  CP/MAS NMR spectra of **3** (top) and resin obtained by curing of **3** at 300 °C (bottom).

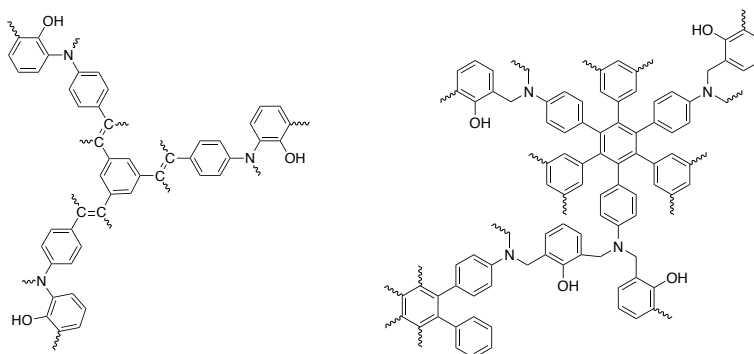

**Fig. S44** Deduced structures of **3** (left) and resin formed by curing of **3** (right)

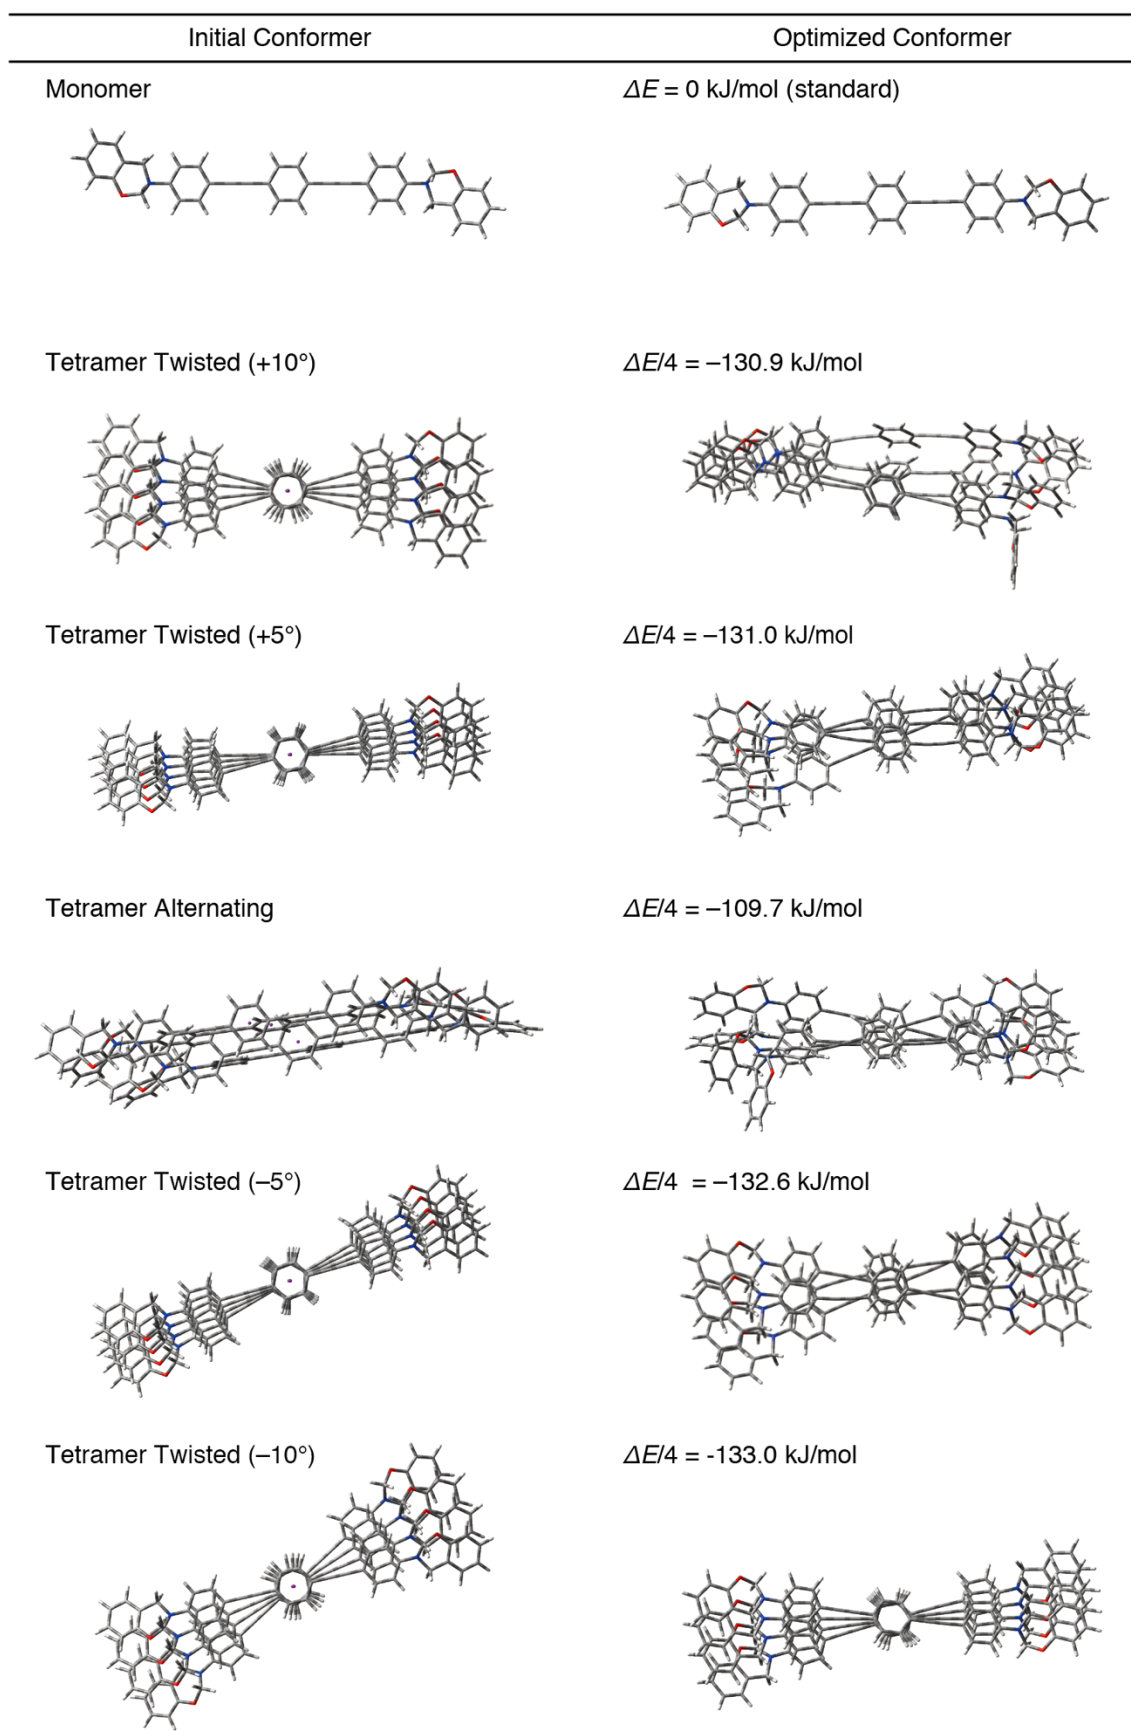

**Fig. S45** Initial and DFT ( $\omega$ B97X-D/6-31G\*)-optimized conformers of monomeric and tetrameric molecular models of **2**.

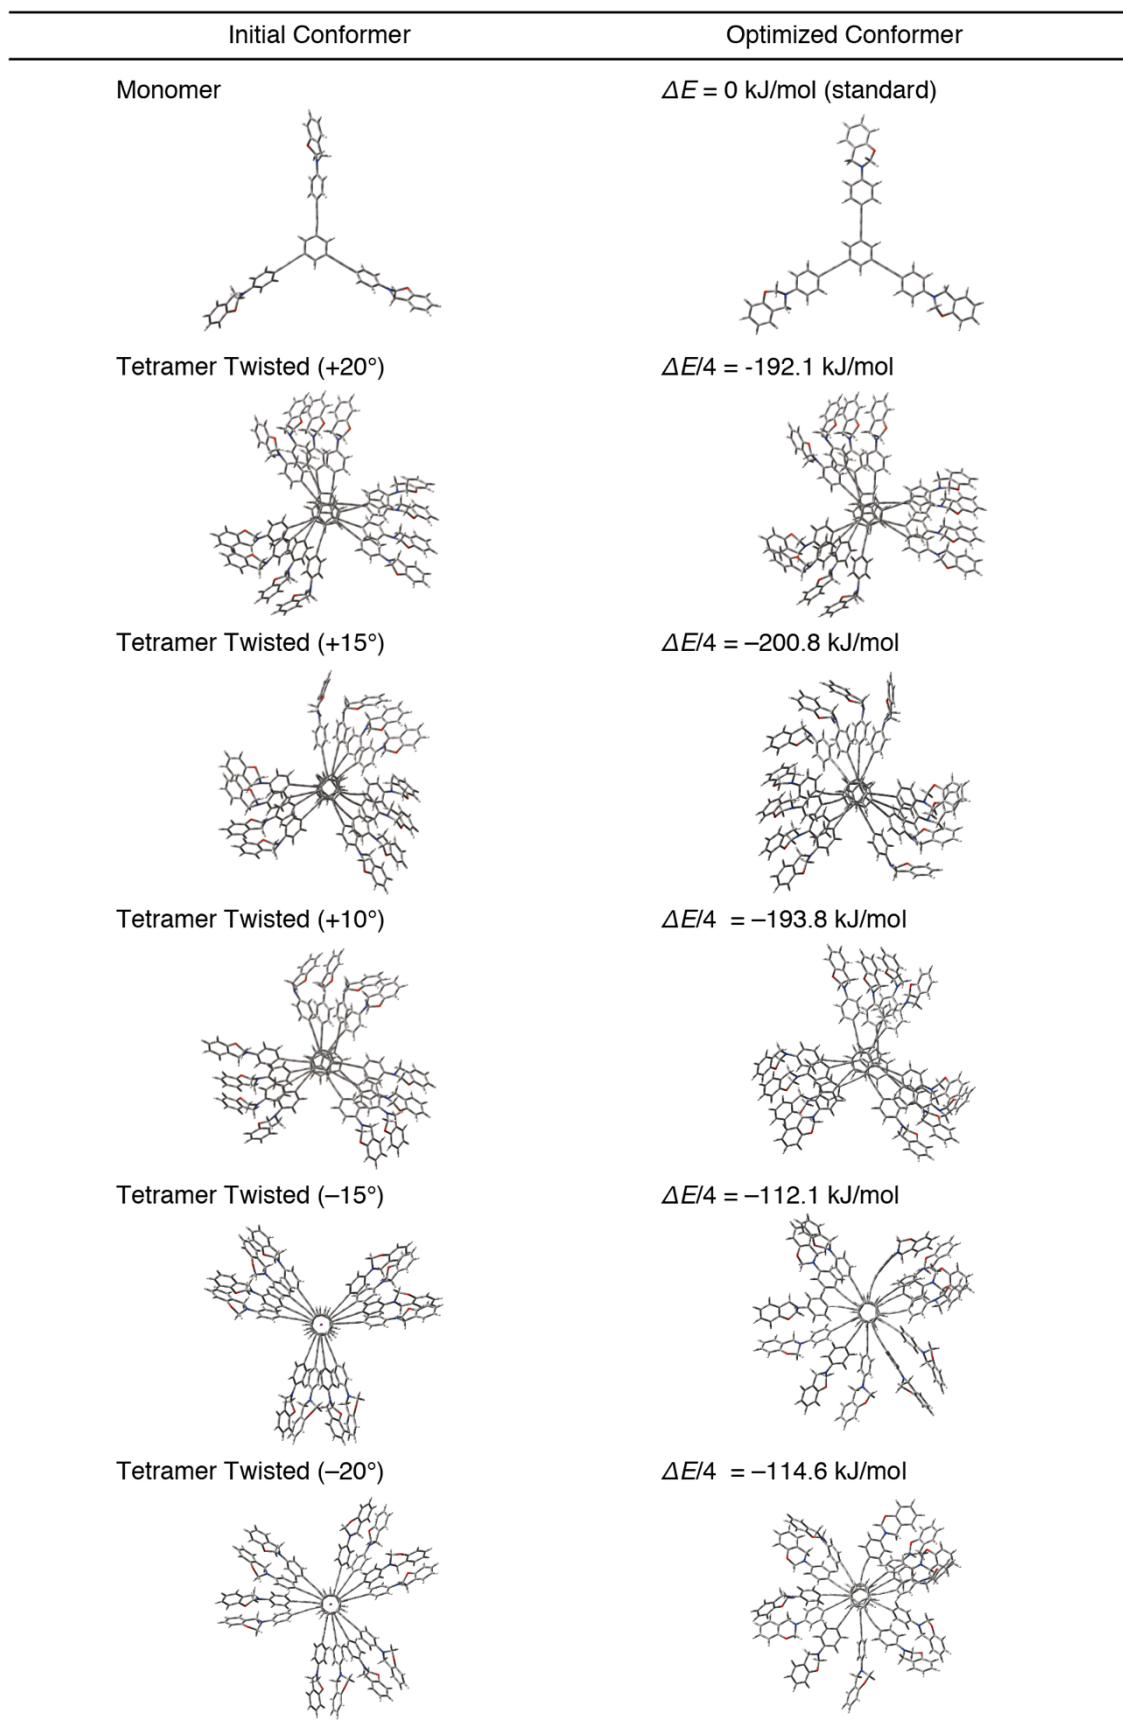

**Fig. S46** Initial and DFT ( $\omega$ B97X-D/6-31G\*)-optimized conformers of monomeric and tetrameric molecular models of **3**.

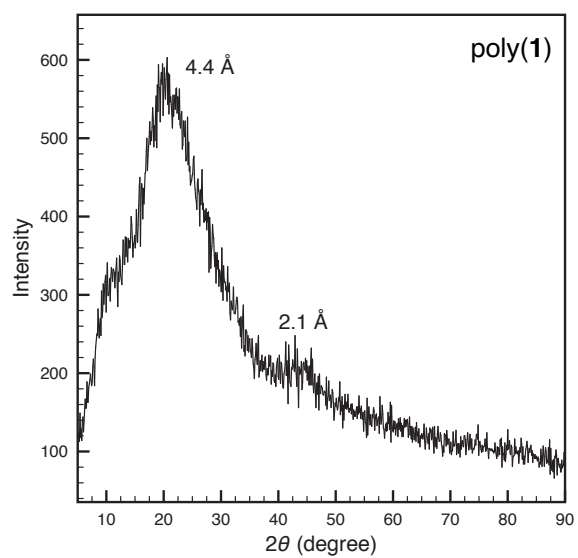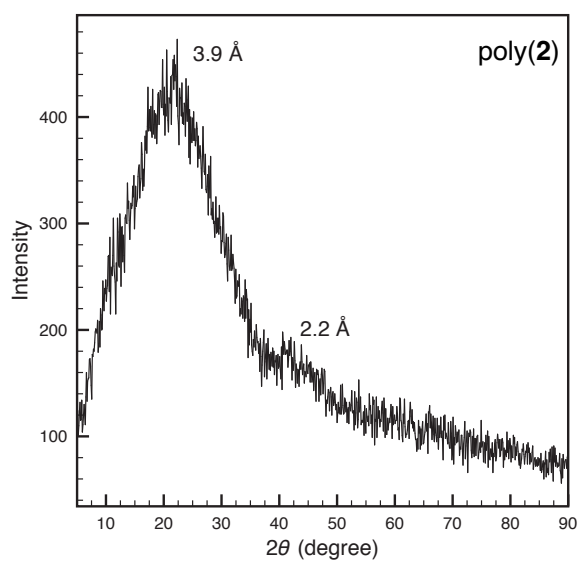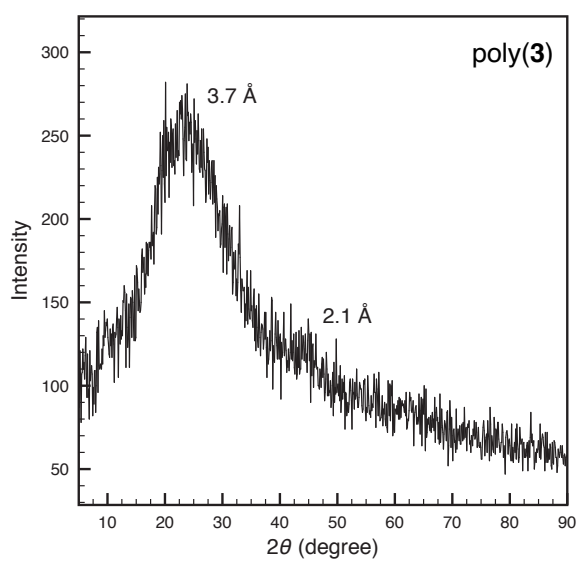

**Fig. S47** Powder XRD patterns of poly(1)–poly(3) with Cu-K $\alpha$  radiation.

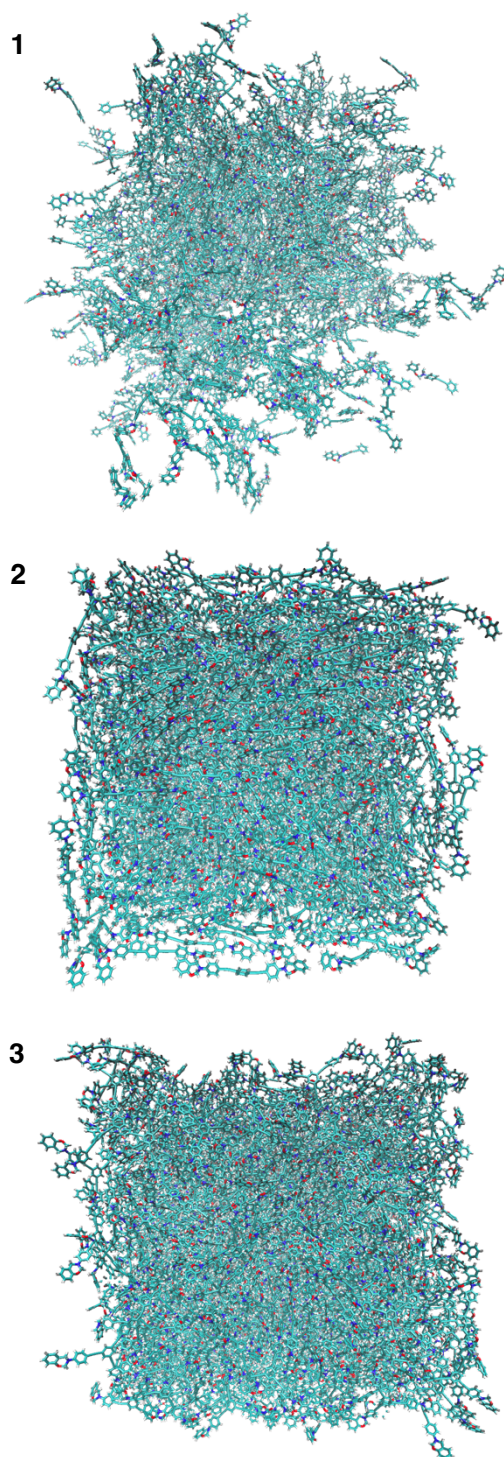

**Fig. S48** Snapshots of trajectories of MD simulation of **1–3** at 5 ns, 300 K using models consisting of 1000 molecules by LAMMPS 2020.<sup>S13</sup> The densities of benzoxazines **1**, **2** and **3** were calculated to be 1.285, 1.313 and 1.264, respectively (average values of a period of 4–5 ns simulated for 1,000 ns). Also see trajectory movies in the Supporting Information.



**Table S1** Observed and MD simulated densities of **1–3**

| Compound | Density (g/cm <sup>3</sup> ) |                           |
|----------|------------------------------|---------------------------|
|          | Observed <sup>a</sup>        | MD simulated <sup>b</sup> |
| <b>1</b> | 1.285                        | 1.126                     |
| <b>2</b> | 1.313                        | 1.158                     |
| <b>3</b> | 1.264                        | 1.154                     |

<sup>a</sup> Average of 10 measurements by gas pycnometry at 26 °C. <sup>b</sup> Average value of a period of 4–5 ns simulated for 1,000 molecules at 300 K with LAMMPS 2020.<sup>S13</sup>

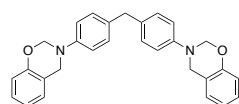

Pd-Bz

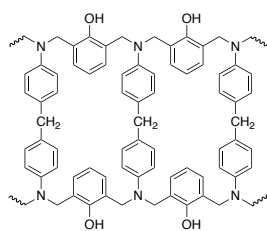

Poly(Pd-Bz)

**Fig. S49** Chemical structures of Pd-Bz and poly(Pd-Bz).

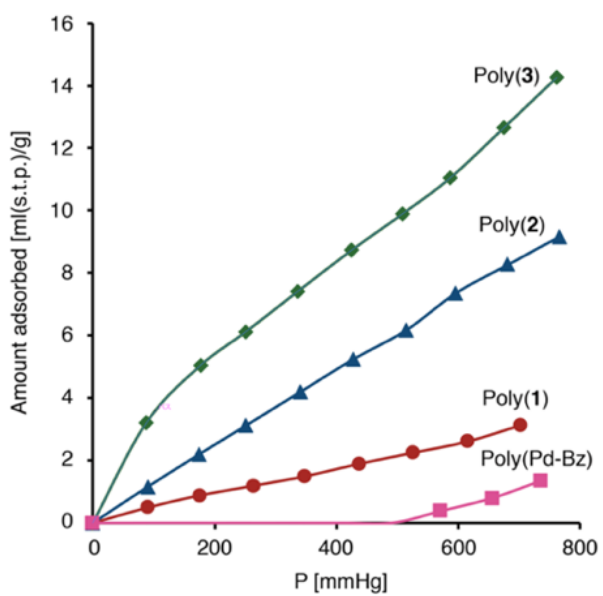

**Fig. S50** CO<sub>2</sub> adsorption isotherms for poly(1)–poly(3) and poly(Pd-Bz) measured at 298 K.

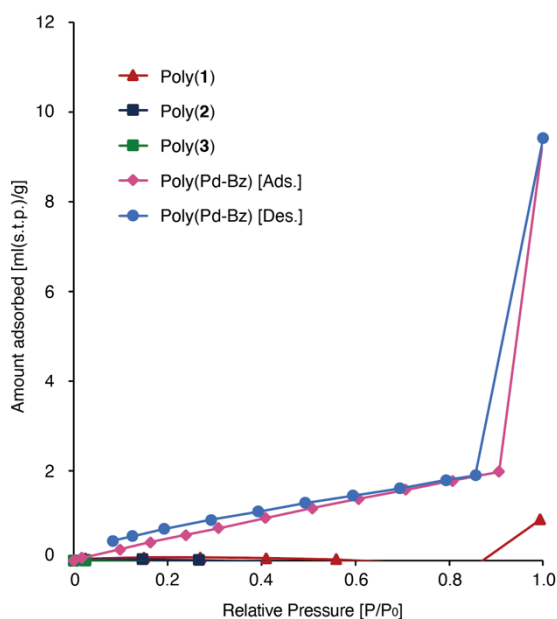

**Fig. S51** N<sub>2</sub> adsorption isotherms for poly(1)–poly(3) and poly(Pd-Bz) measured at 77 K.

**Table S2** Specific surface area, micropore and mesopore volumes of poly(1)–poly(3) and poly(Pd-Bz) determined using N<sub>2</sub>

| Compound    | Specific surface area <sup>a</sup><br>[m <sup>2</sup> /g] | Micropore volume<br>[mL/g] | Mesopore volume<br>[mL/g] |
|-------------|-----------------------------------------------------------|----------------------------|---------------------------|
| Poly(1)     | 0.3                                                       | 0.000                      | – <sup>b</sup>            |
| Poly(2)     | 0.0                                                       | 0.000                      | – <sup>b</sup>            |
| Poly(3)     | 0.0                                                       | 0.000                      | – <sup>b</sup>            |
| Poly(Pd-Bz) | 0.0                                                       | 0.000                      | 0.007                     |

<sup>a</sup> BET analysis. <sup>b</sup> Not determined.

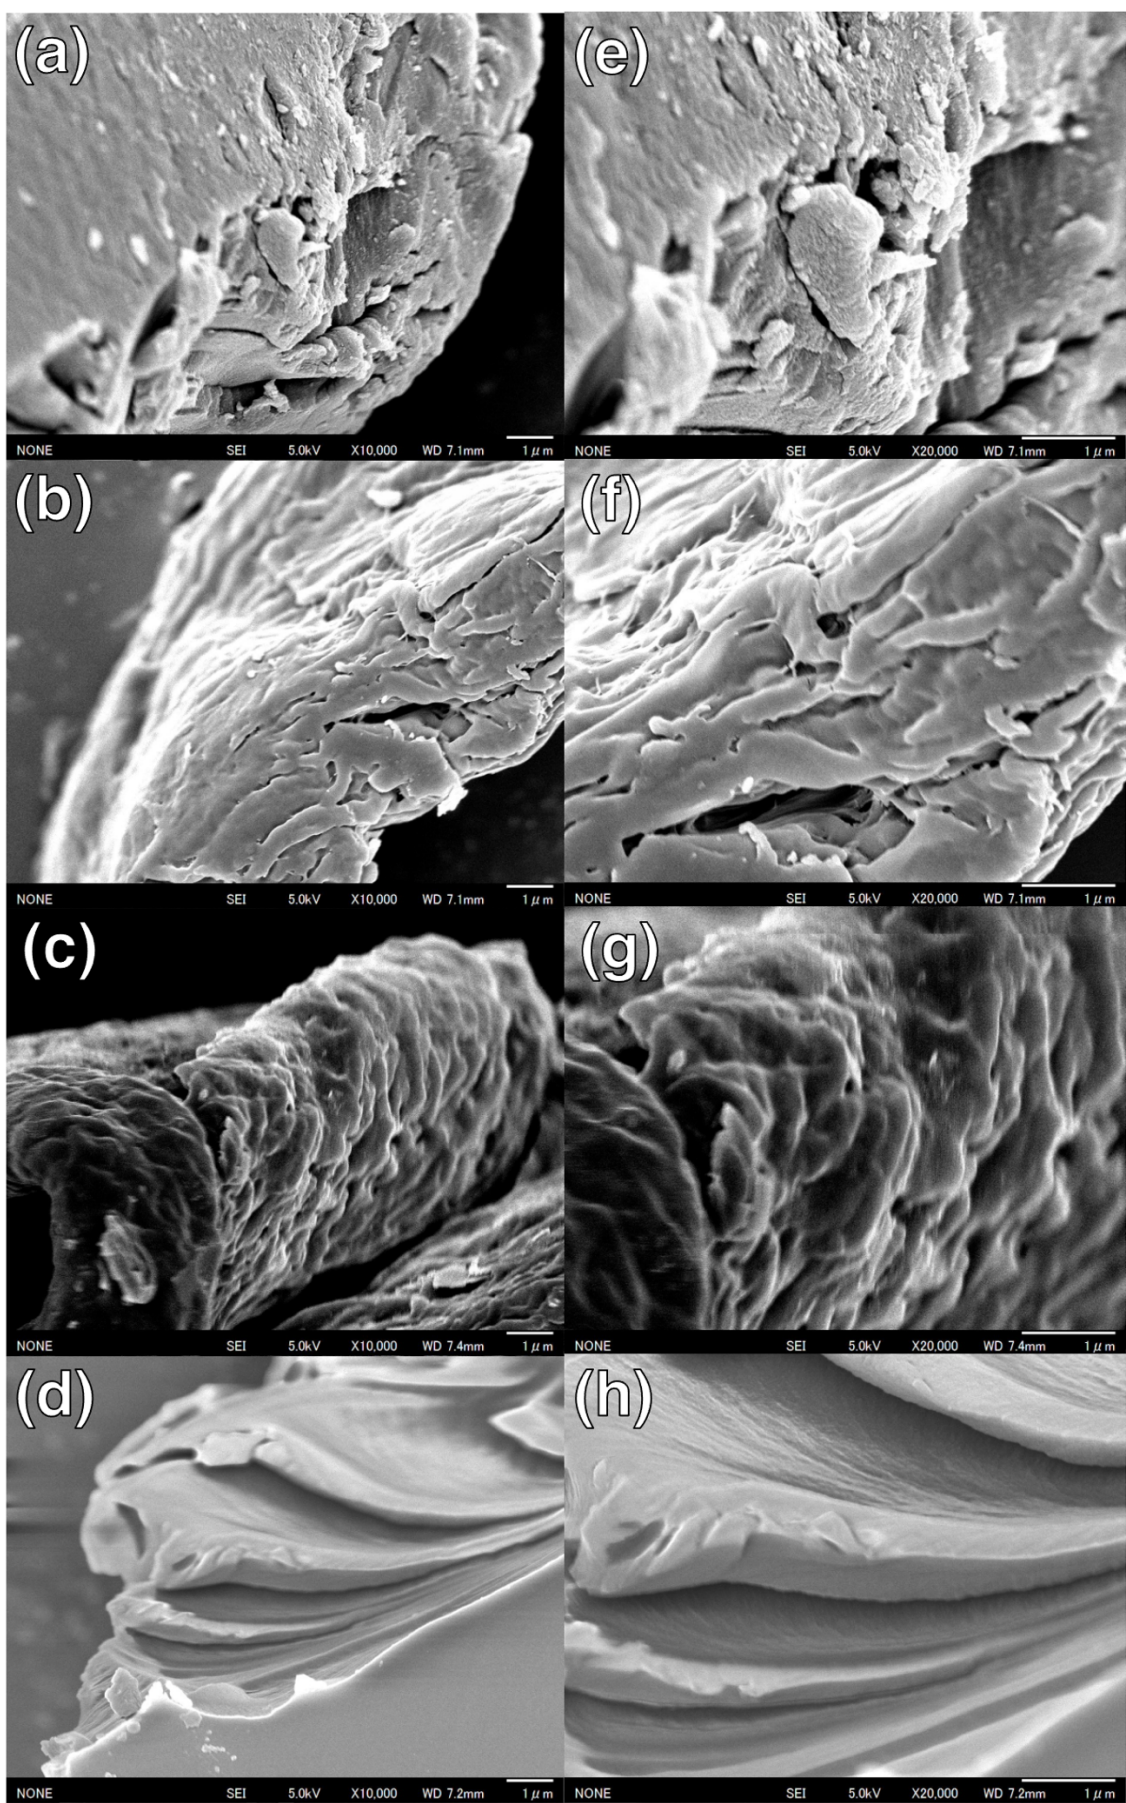

**Fig. S52** FE-SEM images. (a), (e): poly(1), (b), (f): poly(2), (c), (g): poly(3), (d), (h): poly(Pd-Bz).

## References

- S1) O. V. Dolomanov, L. J. Bourhis, R. J. Gildea, J. A. K. Howard, H. Puschmann, *J. Appl. Cryst.*, 2009, **42**, 339–341.
- S2) G. M. Sheldrick, *Acta Cryst.*, 2015, **A71**, 3–8.
- S3) G. M. Sheldrick, *Acta Cryst.*, 2015, **C71**, 3–8.
- S4) M. Goto, Y. Miyagi, M. Minami, F. Sanda, *J. Polym. Sci. Part A: Polym. Chem.*, 2018, **56**, 1884–1893.
- S5) C. Mechtler, M. Zirngast, W. Gaderbauer, A. Wallner, J. Baumgartner, C. Marschner, *J. Org. Chem.*, 2006, **691**, 150–158.
- S6) K. Yamashita, M. Tsuboi, M. S. Asano, K. Sugiura, *Synth. Commun.*, 2012, **42**, 170–175.
- S7) T. Ozawa, *Polymer*, 1971, **12**, 150–158.
- S8) C. Jubsilp, S. Damrongsakkul, T. Takeichi, S. Rimdusit, *Thermochim. Acta*, 2006, **447**, 131–140.
- S9) Y. Liu, Z. Yue, J. Gao, *Polymer*, 2010, **51**, 3722–3729.
- S10) M. J. Frisch, G. W. Trucks, H. B. Schlegel, G. E. Scuseria, M. A. Robb, J. R. Cheeseman, G. Scalmani, V. Barone, G. A. Petersson, H. Nakatsuji, X. Li, M. Caricato, A. V. Marenich, J. Bloino, B. G. Janesko, R. Gomperts, B. Mennucci, H. P. Hratchian, J. V. Ortiz, A. F. Izmaylov, J. L. Sonnenberg, D. Williams-Young, F. Ding, F. Lipparini, F. Egidi, J. Goings, B. Peng, A. Petrone, T. Henderson, D. Ranasinghe, V. G. Zakrzewski, J. Gao, N. Rega, G. Zheng, W. Liang, M. Hada, M. Ehara, K. Toyota, R. Fukuda, J. Hasegawa, M. Ishida, T. Nakajima, Y. Honda, O. Kitao, H. Nakai, T. Vreven, K. Throssell, Jr. J. A. Montgomery, J. E. Peralta, F. Ogliaro, M. J. Bearpark, J. J. Heyd, E. N. Brothers, K. N. Kudin, V. N. Staroverov, T. A. Keith, R. Kobayashi, J. Normand, K. Raghavachari, A. P. Rendell, J. C. Burant, S. S. Iyengar, J. Tomasi, M. Cossi, J. M. Millam, M. Klene, C. Adamo, R. Cammi, J. W. Ochterski, R. L. Martin, K. Morokuma, O. Farkas, J. B. Foresman, D. J. Fox, Gaussian, Inc., Wallingford CT, 2019.
- S11) E. R. Johnson, S. Keinan, P. Mori-Sánchez, J. Contreras-García, A. J. Cohen, W. Yang, *J. Am. Chem. Soc.*, 2010, **132**, 6498–6506.
- S12) J. Contreras-García, E. R. Johnson, S. Keinan, R. Chaudret, J.-P. Piquemal, D. N. Beratan, W. Yang, *J. Chem. Theory Comput.*, 2011, **7**, 625–632.
- S13) A. P. Thompson, H. M. Aktulga, R. Berger, D. S. Bolintineanu, W. M. Brown, P. S. Crozier, P. J. in 't Veld, A. Kohlmeyer, S. G. Moore, T. D. Nguyen, R. Shan, M. J. Stevens, J. Tranchida, C. Trott, S. J. Plimpton, *Comput. Phys. Commun.*, 2022, **271**, 108171–108204.
- S14) H. Chen, Y. Guo, Y. Du, X. Xu, C. Su, Z. Zeng, *Chem. Eng. J.*, 2021, **415**, 128824–128837.
- S15) M. S. Jassim, G. Rochelle, D. Eimer, C. Ramshaw, *Ind. Eng. Chem. Res.*, 2007, **46**, 2823–2833.
- S16) Q.-C. Ran, D.-X. Zhang, R.-Q. Zhu, Y. Gu, *Polymer*, 2012, **53**, 4119–4127.
